1 **A collective modulatory basis for multisensory integration in *C. elegans***

2

3 Gareth Harris<sup>1,2,\*</sup> Taihong Wu<sup>1</sup>, Gaia Linfield<sup>1</sup>, Myung-Kyu Choi<sup>1</sup>, He Liu<sup>1</sup> and Yun Zhang<sup>1,\*</sup>

4

5 1. Department of Organismic and Evolutionary Biology, Center for Brain Sciences, Harvard  
6 University, Cambridge, MA 02138, USA.

7 2. Current address: California State University Channel Islands, 1 University Dr., Camarillo, CA  
8 93012, USA.

9

10

11 \* Corresponding authors

12 E-mail: [gazalad2@hotmail.com](mailto:gazalad2@hotmail.com) or [yzhang@oeb.harvard.edu](mailto:yzhang@oeb.harvard.edu)

13

14

## 15 **Abstract**

16 In the natural environment, animals often encounter multiple sensory cues that are  
17 simultaneously present. The nervous system integrates the relevant sensory information to  
18 generate behavioral responses that have adaptive values. However, the signal transduction  
19 pathways and the molecules that regulate integrated behavioral response to multiple sensory  
20 cues are not well defined. Here, we characterize a collective modulatory basis for a behavioral  
21 decision in *C. elegans* when the animal is presented with an attractive food source together with  
22 a repulsive odorant. We show that distributed neuronal components in the worm nervous  
23 system and several neuromodulators orchestrate the decision-making process, suggesting that  
24 various states and contexts may modulate the multisensory integration. Among these  
25 modulators, we identify a new function of a conserved TGF- $\beta$  pathway that regulates the  
26 integrated decision by inhibiting the signaling from a set of central neurons. Interestingly, we find  
27 that a common set of modulators, including the TGF- $\beta$  pathway, regulate the integrated  
28 response to the pairing of different foods and repellents. Together, our results provide insights  
29 into the modulatory signals regulating multisensory integration and reveal potential mechanistic  
30 basis for the complex pathology underlying defects in multisensory processing shared by  
31 common neurological diseases.

32

## 33 **Author Summary**

34 The present study characterizes the modulation of a behavioral decision in *C. elegans* when the  
35 worm is presented with a food lawn that is paired with a repulsive smell. We show that multiple  
36 sensory neurons and interneurons play roles in making the decision. We also identify several  
37 modulatory molecules that are essential for the integrated decision when the animal faces a  
38 choice between the cues of opposing valence. We further show that many of these factors,  
39 which often represent different states and contexts, are common for behavioral decisions that

- 40 integrate sensory information from different types of foods and repellents. Overall, our results  
41 reveal a collective molecular and cellular basis for integration of simultaneously present  
42 attractive and repulsive cues to fine-tune decision-making.

## 43 **Introduction**

44 An environment is often represented by numerous sensory cues. For example, a tainted food  
45 source can produce both attractive and repulsive odorants. In order to better survive, an animal  
46 often needs to detect and process simultaneously present sensory cues to make a behavioral  
47 decision [1-8]. Because integrating multiple sensory cues generates a more accurate evaluation  
48 of the environment, it provides important adaptive values. Multisensory integration is widely  
49 observed in both the vertebrate and invertebrate animals. Previous studies using behavioral and  
50 psychophysical approaches show that humans and other organisms can integrate an array of  
51 sensory stimuli to generate decisions in every-day life [9-11]. One common characteristic of  
52 multisensory behavioral responses and decision-making processes is their ability to be  
53 modulated by various internal states and contexts, including arousal, sleepiness versus  
54 wakefulness, the motivational or nutritional state of the organism, or the level of the reward  
55 paired with the stimuli. Neurotransmitters, such as dopamine, serotonin, glutamate, and  
56 neuropeptides, mediate many of these neurological effects on decision-making [3, 4, 12-14].  
57 Intriguingly, patients of several neurological diseases, including autism spectrum disorder,  
58 Parkinson's disease, bipolar disorder, depression, schizophrenia, and gambling behaviors,  
59 share deficits associated with sensory processing or decision-making when encountering  
60 multiple sensory stimuli that evoke certain behavioral choices under normal conditions [15-21].  
61 Together, these studies reveal multisensory integration as a common neuronal and behavioral  
62 process modulated by multiple contexts across the animal kingdom and highlight the importance  
63 of understanding the underlying mechanisms in normal as well as disease states.

64

65 Despite the importance of multisensory integration in animal behavior, our understanding of the  
66 underlying signaling mechanisms remains preliminary. The nematode *C. elegans* provides an  
67 opportunity to address the question. *C. elegans* feeds on bacteria. A bacterial lawn provides

68 various types of sensory information, including olfactory, gustatory, mechanical, and gaseous  
69 cues. The small nervous system (302 neurons) of *C. elegans* generates sensorimotor  
70 responses to these modalities [22-33] and many of the responses can be shaped by external  
71 and internal contexts that modulate neural activities [4, 34-38]. The *C. elegans* genome encodes  
72 the homologues of about 50% of the molecules expressed in the mammalian brains [39], which  
73 in combination with a well-defined wiring diagram of the nervous system [40] allows  
74 characterizing of the molecular and circuit basis for multisensory integration during decision-  
75 making.

76  
77 Here, we show that *C. elegans* integrates the information from an attractive food lawn and a  
78 simultaneously present repellent to generate a decision on leaving. We show that the decision  
79 to leave the lawn depends on the attractiveness of the lawn and the concentration of the  
80 repellent. We identify specific neurons and a collection of modulatory molecules that promote or  
81 suppress the food-repellant integration underlying the lawn-leaving decision. We further  
82 demonstrate that the battery of modulatory molecules and neurons act as common modulators  
83 to regulate integrated decisions on different foods paired with different repellants. These  
84 findings identify conserved neuronal signals that modulate multisensory processing during  
85 decision-making and reveal a collective modulatory basis for multisensory integration.

86

## 87 **Results**

### 88 ***C. elegans* integrates multiple sensory cues to generate a behavioral decision**

89 To establish a behavioral assay for multisensory integration in *C. elegans*, we presented a  
90 repulsive odorant, 2-nonanone, to the animals on a small lawn of the *E. coli* strain OP50 (Figure  
91 1A and Experimental Procedures) and assessed the decision of the animals to stay on or leave  
92 the lawn over time. Because the OP50 lawn serves as a food source for the worm, under the

93 standard condition *C. elegans* stays on the lawn and leaves only at a low frequency [41, 42].  
94 Meanwhile, 2-nonanone strongly repels *C. elegans* at concentrations ranging from 10% to  
95 100%. The olfactory sensory neuron AWB detects and mediates the avoidance of 2-nonanone  
96 [43-45]. We first presented a drop of 10% 2-nonanone close to the edge of an OP50 lawn, on  
97 which 15 - 25 young adults acclimatized for one hour (Figure 1A). We found that within a few  
98 minutes the animals migrated to the side of the bacterial lawn away from 2-nonanone, stayed on  
99 the edge of the lawn before dispersing throughout the lawn without leaving (Figure 1B). This  
100 result indicates that *C. elegans* is able to detect and avoid 10% 2-nonanone even on the food  
101 lawn, but the repulsion is not strong enough to suppress the retention of the worm by the food  
102 lawn. In contrast, when we presented a drop of higher concentration of 2-nonanone to the  
103 worms in the same configuration, the worms migrated to the side of the lawn, started to leave  
104 the food lawn in a few minutes, and continued to migrate to the edge of the plate away from the  
105 repellent within the one-hour time window of the assay (Figure 1B, 1C and S9 Movie). The food-  
106 leaving behavior was robustly evoked with 100% 2-nonanone (Figure 1B-1E), under which  
107 condition a significant number of worms already left the lawn after 2-nonanone was presented to  
108 the worms for 15 minutes (Figure 1C). In addition, it took a similar amount of time for the worms  
109 to reach the edge of the lawn that was paired with either 10% or 100% 2-nonanone (Figure 1D).  
110 These results show that *C. elegans* integrates the attraction of a food lawn with the repulsion of  
111 2-nonanone to generate a behavioral decision and that increasing concentration of 2-nonanone  
112 enhances lawn leaving (Figure 1B and 1C). These findings are consistent with the general rule  
113 that governs multisensory integration, where increasing the reliability of a sensory cue, such as  
114 increasing the concentration of 2-nonanone, strengthens the weight of the cue in integration  
115 [46]. To characterize the regulatory mechanisms underlying multisensory integration, we used  
116 100% 2-nonanone as the repellent for the rest of the study unless otherwise described. We  
117 quantified the percentage of the worm outside the OP50 lawn 15 minutes after the assay began,  
118 because it was an early time point when wild type started to show a robust leaving decision.

119

## 120 **Sensory neurons that regulate multisensory integration**

121 To characterize how the nervous system regulates the integrated response to the attractive  
122 OP50 lawn and the repulsive odorant 2-nonanone, we first probed the amphidal sensory  
123 neurons AWB, which mediate avoidance of 2-nonanone via the function of the cGMP-gated  
124 channel subunit *tax-2* [43]. Exposure to 2-nonanone suppresses the intracellular calcium  
125 transients of AWB [44, 45]. Consistently, we found that the transgenic animals that selectively  
126 expressed a hyperactive form of an amiloride-sensitive sodium channel MEC-4 that generated  
127 necrosis of AWB [43, 47] did not leave the OP50 lawn when 2-nonanone was present (Figure  
128 2A) and that many of the worms remained diffusely distributed on the food lawn by the end of  
129 the assay. These transgenic animals were defective in avoiding 2-nonanone in the standard  
130 chemotaxis assay (S1 Table and S5 Figure), consistent with previous findings [43]. AWB-killed  
131 animals also spent more time to reach the edge of the OP50 lawn when 2-nonanone was  
132 present (S2 Table), consistent with the role of AWB in mediating the avoidance of 2-nonanone.  
133 Meanwhile, the transgenic animals with genetically killed AWB stayed on OP50 lawn similarly as  
134 wild type when 2-nonanone was not present (S3 Table). Together, these results show that AWB  
135 regulates the integrated response by mediating the response to the unisensory repellent 2-  
136 nonanone.

137

138 Next, we sought additional sensory neurons that regulated the integrated behavioral decision.  
139 Previous studies identify several sensory neurons that respond to the smell of the *E. coli* strain  
140 OP50 or mediate the behavioral response to the presence or removal of food [22, 44, 48-51]. To  
141 examine the potential role of these sensory neurons in our multisensory integration paradigm,  
142 we first tested a null mutation *ky4* in *odr-7*, which encoded a putative DNA-binding nuclear  
143 receptor that specified the function of the AWA sensory neuron [52], a null mutation *p680* in  
144 *che-1*, which encoded a zinc finger transcription factor required for the development and

145 function of the ASE sensory neuron [53], transgenic animals that selectively expressed a cell-  
146 death activator EGL-1 [54] in the AQR, PQR and URX neurons or the CO<sub>2</sub>-sensing BAG  
147 sensory neuron [28-30, 55-57]. We also tested transgenic animals selectively expressing a cell-  
148 death inducing caspase, or *twk-18(gf)* that encoded a constitutively active form of the potassium  
149 channel TWK-18 [58], or tetanus toxin that eliminated the synaptic release [59] in the ASI, AWC,  
150 ASJ, ADL or ASK neuron [49, 55, 60-64]. We found that all except three of the tested strains  
151 were normal. The transgenic animals that contained genetically-killed ASK left the OP50 lawn  
152 significantly faster than wild type, and the transgenic animals that contained genetically-killed  
153 ASI or expressed the tetanus toxin in ADL left the OP50 lawn significantly more slowly than wild  
154 type (Figure 2B-2D and S4 Table). Because the transgenic animals defective in the function of  
155 ASK or ASI or ADL are not deficient in avoiding 2-nonanone in our standard chemotaxis assay,  
156 in their ability to remain on OP50 lawn when 2-nonanone is not present, as well as in moving to  
157 the edge of the OP50 lawn with the presence of 2-nonanone (S1-3 Tables), these results  
158 together indicate that the sensory neurons ASK, ASI and ADL modulate how rapidly the  
159 behavioral decision to leave the repellent-paired food lawn is made.

160

### 161 **Multisensory integration requires peptidergic and the TGF- $\beta$ pathways**

162 To characterize the mechanisms underlying multisensory integration of food and 2-nonanone,  
163 we examined mutants that were defective in biosynthesis of neurotransmitters. We tested  
164 effects of mutating *tph-1* that encoded tryptophan hydroxylase required for the production of  
165 serotonin [65], *cat-2* that encoded tyrosine hydroxylase needed for the synthesis of dopamine  
166 [66], *tdc-1* that encoded tyrosine decarboxylase required for the synthesis of tyramine and  
167 octopamine, or *tbh-1* that encoded tyramine beta hydroxylase required for the production of  
168 octopamine [67]. Interestingly, all of these mutants exhibited wild-type behavioral decision when  
169 they were exposed to 2-nonanone on an OP50 food lawn (Figure 3A-D and S6 Figure). These  
170 results show that serotonin, dopamine, tyramine or octopamine are not required for 2-



171 nonanone-dependent food leaving, although these neurotransmitters regulate many food-  
172 dependent sensorimotor responses ([32] and references therein).  
173  
174 Next, we examined the function of neuropeptide-encoding genes. We first found that mutations  
175 in the *kpc-1(gk8)* and *egl-3(n150)* that disabled two of the four known peptide pre-processing  
176 enzymes in *C. elegans* [68-70], delayed the decision to leave the food lawn that was paired with  
177 2-nonanone (Figure 3E and 3F), suggesting the modulatory role of peptides or growth factors in  
178 promoting the integrated decision to leave the tainted food lawn. Next, we screened many  
179 mutations in genes encoding peptides or growth factors. We focused on the available mutations  
180 that did not generate any gross defect in either development or locomotion and identified three  
181 mutations that significantly altered the wild-type decision. The canonical mutations, *e1372*, or a  
182 deletion, *ok3125*, in *daf-7* that encoded a TGF- $\beta$  ligand that regulated development, metabolism  
183 and host-pathogen recognition [71-73], significantly delayed the decision to leave the OP50  
184 lawn tainted with 2-nonanone (Figure 3G and 3I). A deletion mutation *tm2984* in *nlp-7*, which  
185 encoded a neuropeptide-like protein that regulated stress response, egg-laying, life span and  
186 modulation of aversive responses to noxious stimuli [74-77], similarly delayed the decision to  
187 leave the lawn (Figure 3H). However, the mutations in *daf-7* or *nlp-7* did not generate any  
188 detectable defect in the chemotactic response to 2-nonanone alone, or the tendency to leave  
189 the OP50 lawn when no repellent was present, or the ability to move to the edge of the lawn  
190 when 2-nonanone was present (S1-3 Tables). In addition, expressing the genomic fragment  
191 containing the regulatory and coding regions of *daf-7* or *nlp-7* fully rescued the defect of the  
192 respective mutant animals in making the decision to leave the lawn that was paired with 2-  
193 nonanone (Figure 3I and 3J). Together, these results indicate that TGF- $\beta$ /DAF-7 and NLP-7  
194 promote the food-leaving decision when 2-nonanone is present.

195

196 **A new function of the TGF- $\beta$ /DAF-7 canonical pathway in multisensory integration**

197 The *C. elegans* TGF- $\beta$ /DAF-7 regulates several physiological processes through the conserved  
198 type I and type II TGF- $\beta$  receptor, DAF-1 and DAF-4, respectively [78, 79]. DAF-7 is found in the  
199 sensory neurons OLQ, ADE and ASI, all of which are implicated in sensing bacteria [23, 71, 72,  
200 80, 81]. DAF-7 produced by ASI regulates the satiety-induced quiescence, the entry into an  
201 alternative developmental stage under the environmental stress, and the modulation of the  
202 lifespan by dietary restriction, and responds to the abundance of food [72, 80-83]. The  
203 expression of *daf-7* is induced in the sensory neuron ASJ upon exposure to pathogenic bacteria  
204 and DAF-7 in ASJ regulates the avoidance of the pathogen through DAF-1 and DAF-4 receptors  
205 [71]. In addition, through DAF-1 and DAF-4, DAF-7 regulates metabolism and fat accumulation  
206 [73]. Here, we showed that mutating *daf-7* delayed the decision to leave the food lawn when 2-  
207 nonanone was present (Figure 3G). To identify the source of the DAF-7 signal regulating  
208 multisensory integration, we tested the transgenic animals that selectively expressed a wild-type  
209 *daf-7* cDNA in subsets of *daf-7*-expressing neurons in *daf-7* mutant animals for potential  
210 rescuing effects. We found that expressing *daf-7* selectively in ASI (*Pstr-3::daf-7* [71]) did not  
211 rescue the defects in the integrated response; but expressing *daf-7* in ADE (*Pcat-2::daf-7*) or  
212 OLQ (*Pocr-4::daf-7*) sensory neurons using cell-selective promoters [84-86] rescued the  
213 delayed leaving phenotype in the *daf-7(e1372)* mutant animals (Figure 3K and 3L, S7 Figure).  
214 In addition, we found that the canonical mutation in the type I and type II TGF- $\beta$  receptor, *daf-*  
215 *1(m40)*, similarly delayed the decision to leave the OP50 lawn paired with 2-nonanone (Figure  
216 4A). Expressing either the genomic DNA fragment of *daf-1* or the *daf-1* cDNA selectively in the  
217 interneurons RIM and RIC (*Pdaf-1::daf-1* or *Ptdc-1::daf-1*; [71, 73]) fully rescued the defect in  
218 the *daf-1(m40)* mutant animals (Figure 4B and 4C), while expressing *daf-1* in sensory neurons  
219 (*Pbbs-1::daf-1* or *Posm-6::daf-1*; [71]) was not sufficient to rescue (Figure 4D and S8 Figure).  
220 Together, these results indicate that the TGF- $\beta$ /DAF-7 signal produced by the ADE or the OLQ  
221 sensory neurons acts through the type I TGF- $\beta$  receptor DAF-1 in RIM and/or RIC neurons to  
222 promote repellent-dependent leaving of the food lawn.

223

224 To further interrogate the role of the RIM/RIC neurons in multisensory integration, we examined  
225 the transgenic animals that expressed a histamine-gated chloride channel in the RIM and RIC  
226 neurons under the histamine-treated condition [87] or the transgenic animals that expressed  
227 tetanus toxin [59] in RIM and RIC. We found that these transgenic animals were normal in  
228 leaving the OP50 lawn when 2-nonanone was present (Figure 4E and 4F). Since neither the  
229 *tdc-1(n3419)* mutant animals that lacked tyramine and octopamine nor the *tbh-1(n3247)* mutant  
230 animals that lacked octopamine is defective in their decisions to leave the OP50 lawn paired  
231 with 2-nanone (Figure 3), together, our results suggest that RIM/RIC and the release of the  
232 neurotransmitter tyramine and octopamine from these neurons may be suppressed during the  
233 integrated response to the simultaneously present food lawn and 2-nonanone. To further  
234 interrogate the role of tyramine or octopamine signaling in the *daf-7*- and *daf-1*-dependent  
235 integrated response, we tested how removing tyramine and/or octopamine affects the delayed  
236 food leaving in the *daf-7(e1372)* or *daf-1(m40)* mutant animals. Interestingly, both of the *daf-*  
237 *1(m40); tbh-1(ok1196)* and the *daf-7(e1372); tbh-1(ok1196)* double mutant animals [19]  
238 behaved like the *daf-1(m40)* and the *daf-7(e1372)* single mutants, respectively (Figure 4G). In  
239 contrast, the mutation in *tdc-1(ok914)* strongly suppressed the delayed decision phenotype in  
240 both *daf-7(e1372)* and *daf-1(m40)* mutant animals (Figure 4H and 4I). While TDC-1 is needed  
241 for the production of tyramine and octopamine in both RIM and RIC, TBH-1 is only needed for  
242 the biosynthesis of octopamine in RIC [67]. Together, these results show that the TGF- $\beta$ /DAF-7  
243 regulates the decision between staying on a food lawn versus avoiding a repellent through the  
244 canonical signaling pathway and that the DAF-7 peptidergic signal produced from ADE or OLQ  
245 inhibits the tyramine neurotransmission of RIM and/or RIC to promote the decision to leave the  
246 food-lawn that is paired with 2-nonanone.

247

248 **Different interneurons play opposite roles in multisensory integration**

249 To better characterize the neural circuits underlying multisensory integration, we probed the  
250 potential interneurons that regulated the decision between staying on the food lawn versus  
251 avoiding 2-nonanone. We focused on the interneurons AIY, AIB, and the command  
252 interneurons, all of which regulate locomotion [22, 88]. AIY and AIB are also the major  
253 interneurons postsynaptic to the sensory neurons that respond to the bacterial food or the  
254 repellent 2-nonanone [40]. To disrupt the function of AIY, we selectively expressed in AIY a  
255 gain-of-function isoform of a potassium channel TWK-18 [58] to inhibit the activity of AIY (*Pttx-*  
256 *3::twk-18(gf)*) or the tetanus toxin (*Pttx-3::TeTx*) to block synaptic release. We also tested the  
257 *ttx-3(mg158)* mutants that failed to develop AIY interneurons [89]. All three mutations delayed  
258 the decision to leave the lawn (Figure 5A - 5C). However, these manipulations do not disrupt the  
259 ability to reach the edge of the food lawn during 2-nonanone-dependent food leaving, to avoid  
260 2-nonanone alone, or to stay on OP50 lawn when no repellent was present (S1-3 Tables). In  
261 contrast, selectively expressing the tetanus toxin in the AIB interneurons or treating the  
262 transgenic animals expressing the histamine-gated chloride channel in AIB with histamine did  
263 not significantly alter the decision to leave the OP50 lawn that was paired with 2-nanonone  
264 (Figure 5D and 5E). Together, these results indicate that the activity and the synaptic output of  
265 the AIY interneurons promote the decision to leave the food lawn paired with 2-nonanone, while  
266 AIB is dispensable for the decision-making. Next, we examined transgenic animals that  
267 expressed the tetanus toxin with the *nmr-1* promoter or the *glr-1* promoter. The *nmr-1* promoter  
268 is expressed in a few command interneurons including AVA, AVB, AVD, AVE and PVC, while  
269 the *glr-1* promoter is expressed in several head motor neurons in addition to the *nmr-1*-  
270 expressing interneurons [90]. Interestingly, both transgenic lines left the 2-nonanone paired food  
271 lawn more than wild type (Figure 5F and 5G). However, these transgenic animals are normal in  
272 2-nonanone avoidance in the absence of food or spontaneous food leaving. They also do not  
273 reach the edge of the lawn more rapidly than wild type (S1-3 Tables). Together, these results  
274 show that different downstream neurons modulate the decision to leave the repellent tainted

275 food lawn in opposite ways by promoting or inhibiting the decision-making process. These  
276 neurons may act as the convergent sites to process multiple sensory signals in order to  
277 generate specific behavioral outputs.

278

### 279 **Multisensory integration is regulated by a common set of modulators**

280 Next, we asked whether the molecular and circuit mechanisms underlying the integrated  
281 response to the OP50 food lawn paired with 2-nonanone were shared by the integrated  
282 responses to different pairing of attractive foods and repulsive odorants. We paired the OP50  
283 lawn with various repellants, including 100% 1-octanol and 100% benzaldehyde. While  
284 benzaldehyde is attractive at low concentrations [24], 100% benzaldehyde strongly repels *C.*  
285 *elegans* in a way that is dependent on the function of the sensory neuron AWB [91-93]. We  
286 found that a drop of 100% benzaldehyde first repelled the animals to the edge of the OP50 food  
287 lawn and then in about 10-15 minutes started to repel the animals off the food lawn (Figure 6A  
288 and S10 Movie). Interestingly, 1-octanol failed to stimulate food leaving under our experimental  
289 conditions (Figure 6A). We also paired a lawn of *Comamonas sp* with 100% 2-nonanone.  
290 *Comamonas* is an attractive food source for *C. elegans* [41]. We found that pairing a  
291 *Comamonas* bacterial lawn with 100% 2-nonanone repelled *C. elegans* off the lawn similarly as  
292 the OP50 lawn paired with 2-nonanone (Figure 7A). Interestingly, we found that several  
293 modulators, particularly TGF- $\beta$ /DAF-7, the TGF- $\beta$  receptor DAF-1, and the sensory neurons  
294 ASK, that regulated the integrated response to an OP50 lawn paired with 100% 2-nonanone  
295 also similarly regulated the integrated response to OP50 lawn paired with 100% benzaldehyde  
296 and the integrated response to the *Comamonas* lawn paired with 100% 2-nonanone (Figure 6  
297 and 7). Together, these results indicate that a common set of modulators and signaling  
298 mechanisms regulates integrated behavioral decision on whether to leave or stay on an  
299 attractive food lawn paired with an odorant repellent.

300

## 301 **Discussion**

302 Many organisms can combine information from multiple simultaneously present sensory cues to  
303 regulate behavioral outputs [1-8, 32]. While the importance of integrated behavioral responses  
304 to multiple sensory stimuli is appreciated, the underlying molecular and signaling mechanisms  
305 are not well understood. Using our behavioral paradigm for multisensory integration, we  
306 characterize the modulators and signaling pathways that regulate a decision to leave a food  
307 lawn that is paired with a repulsive odorant. These findings reveal a new function of a conserved  
308 TGF- $\beta$  that modulates decision-making by regulating the tyramine signal from a set of central  
309 neurons. Our results elucidate a set of common molecular and neuronal factors that mediate  
310 decision-making when the worm is presented with different pairs of stimuli generated by an  
311 attractive food and a repulsive odorant (Figure 8).

312

### 313 **Specific sensory neurons regulate multisensory integration**

314 One potential mechanism to regulate a coherent behavioral response to multiple simultaneously  
315 present sensory cues is to utilize sensory neurons that are capable of perceiving some or all of  
316 the cues. These types of sensory responses can involve either activation or inhibition of certain  
317 sensory neurons that detect distinct stimuli. Worms are capable of sensing both food signals  
318 and a range of repulsive cues ([32] and the references therein). Here, we characterize the  
319 functions of several sensory neurons in regulating the repellent-dependent food leaving when *C.*  
320 *elegans* is exposed to an attractive food lawn concurrently with a repulsive odorant. We confirm  
321 the requirement of the AWB sensory neuron that is known to sense repellents, including 2-  
322 nonanone and 100% benzaldehyde [43, 45, 91]. AWB also responds to bacterial food [44, 51].  
323 Previous studies identify the role of AWB in promoting food leaving under malnourished  
324 conditions [94], suggesting the involvement of AWB in integrating the nutritional state with the

325 food signals. Thus, AWB may regulate the integrated response by simultaneously processing  
326 food smells and repulsive odorants.

327  
328 Interestingly, we also uncover a novel role of three sensory neurons that modulate the decision  
329 to leave a food paired with a repulsive odorant. We show that the ASK sensory neuron  
330 suppresses the integrated food-leaving decision, while the ASI and ADL sensory neurons  
331 promote it. In contrast, we find that several other sensory neurons previously implicated in  
332 mediating responses to food-related cues, including AWA, ASE, AWC, ASJ, BAG, AQR, PQR or  
333 URX [44, 48, 49, 51, 71], are dispensable in regulating the integrated behavioral response to the  
334 food lawn paired with 2-nonanone (S4 Table). In addition, our results suggest that the effect of  
335 removing either ASK or ASI or ADL on the decision-making does not result from the altered  
336 chemotactic response to 2-nonanone as a unisensory cue or to the OP50 bacterial lawn alone  
337 (S1-3 Tables). These results together reveal a specific function of ASK, ASI and ADL in  
338 integrating the food signals with the repellent to generate a decision between two sensory cues  
339 of opposing valence.

340  
341 Previous studies show that ASK and ASI sensory neurons respond to *E. coli* OP50 by changing  
342 the intracellular calcium levels [51, 95]. Both ASI and ASK are involved in evaluating the food  
343 environment. ASI also mediates the balance between food intake and fat storage, as well as  
344 experience-dependent changes in food response [37, 73, 80-82, 96]. ASK regulates responses  
345 to pheromones and plays a role in food leaving in mutants that are significantly food-deprived  
346 and modulates locomotion during pre-exposure to unpredictable food environments [49, 63, 64,  
347 94]. The ADL sensory neuron has been shown to modulate the responses to octanol,  
348 pheromone and the preference for certain food odors [64, 77], suggesting that ADL mediates  
349 various context-dependent sensory responses to modulate behavior and decision-making. In  
350 our present study, we propose that ASI, ADL and ASK neurons represent the strength of the

351 food signals in an antagonistic manner to mediate a balanced behavioral decision between an  
352 attractive food and a repulsive odorant.

353

### 354 **Neuropeptides and growth factors modulate multisensory integration**

355 Although previous studies characterize the function of neuromodulators, including  
356 neuropeptides and growth factors, in modulating olfactory responses and nutrition-dependent  
357 state of the nervous system, how neuromodulatory signals regulate a behavioral decision that  
358 integrates cues of opposing values is not well understood. Here, we characterize the role of  
359 neuromodulatory molecules, including a conserved TGF- $\beta$ , in modulating the decision to leave a  
360 food lawn when a repulsive odorant is presented together with the lawn.

361

362 Neuropeptides and growth factors have been implicated in the context-dependent modulation of  
363 several sensorimotor responses in *C. elegans* [3, 34, 77, 96-98]. Here, we identify the  
364 neuropeptidergic signaling mechanisms based on the examination of the neuropeptide  
365 processing mutants, *egl-3* and *kpc-1*, and identification of the NLP-7 peptide and the TGF-  
366  $\beta$ /DAF-7 that modulate the decision to leave a food lawn paired with a repulsive odorant.  
367 Mutating *nlp-7* or *daf-7* delayed the decision to leave the lawn. In contrast, mutating genes that  
368 encode several other peptides that are expressed in different sensory neurons and have been  
369 shown to signal contextual cues or previous experience or food signals, including *ins-6*, *ins-7*,  
370 *nlp-1*, *nlp-9*, *nlp-24* and *flp-19* [62, 77, 96, 97, 99], does not have a significant effect (S4 Table),  
371 suggesting a specific function of *nlp-7* and *daf-7* in regulating the decision-making process. *nlp-*  
372 *7* is expressed in several amphidial sensory neurons that respond to contextual cues and NLP-7  
373 delays the acute avoidance of a noxious stimulus, 1-octanol [74-77, 100]. This effect is in  
374 contrast with that of mutating *nlp-7* in the integrated behavioral response, where NLP-7  
375 promotes the decision to leave the food in order to avoid the repulsive odorant. Our results



376 together with the previous findings characterize distinct functions of the NLP-7 neuropeptide in  
377 regulating multisensory integration versus context-dependent avoidance of noxious stimuli.  
378  
379 Previous studies show that the DAF-7 pathway regulates dauer formation, food intake, fat  
380 storage, as well as avoidance of pathogenic bacteria after prolonged exposure. The functions of  
381 DAF-7 in these physiological events depend on its expression in the sensory neurons ASI  
382 and/or ASJ [71-73]. Here, we show that DAF-7 promotes the decision to leave the food lawn  
383 paired with a repulsive odorant and that different from its previously identified role, the function  
384 of DAF-7 in regulating multisensory decision depends on the expression of *daf-7* in either the  
385 ADE or the OLQ sensory neurons. Our results are the first to characterize the function of *daf-7*  
386 produced by ADE or OLQ. ADE is one of the dopaminergic neurons in the worm nervous  
387 system [101]. However, we did not see any phenotype in the *cat-2* mutants that were defective  
388 in dopamine synthesis (Figure 3), suggesting that the function of ADE in regulating the  
389 integrated response to food and repellent is independent of dopamine. Both ADE and OLQ have  
390 been previously implicated in mechanosensation – OLQ is implicated in sensing the gentle  
391 touch delivered to the nose and ADE contributes to the slowing response when a worm enters a  
392 bacterial lawn [23, 31, 102]. We propose that ADE and OLQ regulate the integrated response to  
393 a food lawn paired with a repellent by representing the mechanical stimulus that a worm senses  
394 from the food lawn.

395  
396 We further show that the canonical TGF- $\beta$  receptor DAF-1 acts in the interneurons RIM and RIC  
397 to regulate the decision to leave the food lawn paired with a repulsive odorant. Interestingly,  
398 inhibiting the activity of RIM and RIC, or blocking the synaptic outputs of these neurons, or  
399 disrupting the biosynthesis of the common neurotransmitter of these neurons, tyramine, does  
400 not significantly change the decision-making process. However, disrupting the production of  
401 tyramine, but not octopamine, in these neurons suppresses the slow-decision phenotype in the

402 *daf-1* or *daf-7* mutant animals (Figure 3 and 4). Together, these results indicate that the DAF-  
403 7/DAF-1 pathway promotes the decision to leave by inhibiting the tyramine signaling from these  
404 interneurons. This regulatory mechanism of DAF-7 is reminiscent of that in feeding, where DAF-  
405 7 promotes the pumping rate by inhibiting the output from the RIM and/or RIC neurons.  
406 However, different from the function of DAF-7 in regulating feeding that is dependent on  
407 tyramine and/or octopamine [73], DAF-7 modulates the signal of tyramine, but not octopamine,  
408 to regulate the decision to leave a food paired with the repellant 2-nanonone.

409  
410 The RIM and RIC neurons have been previously implicated in various sensorimotor responses,  
411 as well as the context-dependent locomotory and feeding behaviors [67, 73, 87, 100, 103]. Our  
412 results that characterize RIM/RIC as the downstream neurons of the TGF- $\beta$  /DAF-7 signal in  
413 regulating the decision to leave a tainted food lawn further reveal RIM/RIC as one of the central  
414 sites where different sensory signals converge to generate appropriate behavioral outputs.  
415 Previously, TGF- $\beta$  signals have been implicated in various neuronal functions, including learning  
416 and memory, neural plasticity in the forms of LTP and LTD, synaptic formation, dendritic  
417 development, and regulation of the function of the neural-muscular junctions [104-107]. Defects  
418 in TGF- $\beta$  pathways have been implicated in the pathology of neurological disorders, such as  
419 schizophrenia, depression, anxiety and Alzheimer's disease [108-110]. Our work reveals a new  
420 role for TGF- $\beta$  signals in regulating decision-making, when sensory cues of opposing valence  
421 are simultaneously present.

422  
423 **Specific interneurons modulate 2-nanonone-dependent food leaving in *C. elegans*.**

424 The ability to integrate multiple types of sensory stimuli requires not only the responses across  
425 peripheral sensory areas, but also the signal processing in downstream network of interneurons  
426 [1, 3, 5-8, 111]. In *C. elegans*, a number of sensorimotor responses are modulated by specific  
427 contexts via the functions of several interneurons [34, 97, 100, 112]. However, how interneurons

428 mediate decision-making during multisensory behavior is not fully characterized. Here, by  
429 examining a number of interneurons that are downstream of the sensory neurons that detect the  
430 food-related cues and the repulsive odorant, we find that the AIY interneuron and command  
431 interneurons, as well as motor neurons, play a modulatory role in 2-nonanone-dependent food  
432 leaving. Disrupting the function of AIY significantly delays the decision to leave the food paired  
433 with 2-nonanone, without altering the response to either of the two cues that is presented alone.  
434 The AIY interneuron receives synaptic inputs from sensory neurons that detect olfactory,  
435 gustatory and thermal information. Previous studies implicate AIY in integrating simultaneously  
436 present aversive and attractive cues in olfactory plasticity and in food and serotonin-dependent  
437 modulation of sensorimotor responses [34, 97, 112-114]. We propose that AIY may act as an  
438 integrating site that receives and processes signals from the food and the repellent 2-nonanone  
439 during multisensory integration. In contrast, we did not detect a role for the interneuron AIB with  
440 our assay, suggesting the functional diversity among the interneurons in modulating 2-  
441 nonanone-dependent food leaving. Our study also implicates the *glr-1*- and *nmr-1*-expressing  
442 neurons in promoting the repellent-dependent food leaving. It is conceivable that some of the  
443 *nmr-1*-expressing command interneurons and the *glr-1*-expressing command interneurons or  
444 head motor neurons may serve as the downstream-modulated targets for the integrated  
445 behavioral response.

446

#### 447 **A common set of modulators regulate repellent-dependent food leaving**

448 For freely feeding animals, such as *C. elegans*, appropriate behavioral responses to food  
449 sources paired with other sensory cues are critical for survival, because food can be easily  
450 contaminated with toxins. To understand to what extent the identified modulators generally  
451 regulate integrated responses to foods and repellents, we paired the *E. coli* strain OP50 with  
452 either 100% 2-nonanone or 100% benzaldehyde. We also paired 100% 2-nonanone with a  
453 second food, *Comamonas*. Interestingly, we found that the TGF- $\beta$ /DAF-7 pathway and the ASK

454 sensory neuron regulate the integrated responses to these two different pairs of foods and  
455 repellents. Avoidance of both 100% 2-nonanone and 100% benzaldehyde depends on the  
456 function of the olfactory sensory neurons AWB [43, 45, 91, 115]. Meanwhile, *Comamonas sp*  
457 also serves as an attractive food source to the worms [41]. It is conceivable that a common set  
458 of modulators represent the contexts where the worm needs to evaluate the opposing values  
459 provided by a source of nutrients and a potential threat to generate a behavioral decision.

460

## 461 **Figure legends**

462 **Fig 1. *C. elegans* performs multisensory integration to leave food paired with a repulsive**  
463 **odorant 2-nonanone.**

464 **(A)** A schematic of 2-nonanone-dependent food leaving assay.

465 **(B)** The time course for worms leaving OP50 lawn that is paired with 2-nonanone of different  
466 concentrations over 60 minutes, n = 2 assays for 10% and n = 3 assays each for 30%, 50% and  
467 100%.

468 **(C)** More worms leave the OP50 food lawn paired with 100% 2-nonanone (n = 4 assays) than  
469 the OP50 lawn paired with 10% 2-nonanone (n = 5 assays). Bar graph represents the  
470 percentage of worms outside the lawn 15 minutes after the assay starts.

471 **(D)** The time taken for worms to reach the edge of the OP50 food lawn when the lawn is paired  
472 with either 10% or 100% 2-nonanone, n = 2 assays each.

473 **(E) I – IV**, Sample images of wild-type animals leaving an OP50 lawn that is paired with 100% 2-  
474 nonanone at different time points of the 60-minute assay.

475 For **B-D**, Mean  $\pm$  SEM, Student's *t* test, \*\*  $p \leq 0.01$ , n.s., not significant.

476

477 **Fig 2. Several sensory neurons modulate 2-nonanone-dependent food leaving.**

478 **(A-D)** The transgenic animals that either lack the functional AWB sensory neuron by selectively  
479 expressing the gain-of-function isoform of an amiloride-sensitive sodium channel MEC-4 (**A**,  
480 *pAWB::mec-4(d)*, n = 5 assays each) or lack the ASI sensory neuron by expressing a cell death  
481 promoting molecule caspase (**B**, *pASI::caspase*, n = 7 assays for wild type and 8 assays for the  
482 transgenic animals) or are defective in the synaptic transmission of the ADL sensory neuron by  
483 expressing the tetanus toxin (**D**, *pADL::TeTx*, n = 5 assays for wild type, 4 assays for the  
484 transgenic animals, and 3 assays for non-transgenic siblings) display a delayed decision to  
485 leave the OP50 lawn paired with 100% 2-nonanone; while the transgenic animals that express  
486 caspase in the ASK sensory neuron (**C**, *pASK::caspase*, n = 9 assays each) display a faster  
487 decision to leave.

488 Each bar graph reports the average percentage of worms outside the lawn 15 minutes after the  
489 assay starts. Mean  $\pm$  SEM, Student's *t*-test, \*  $p \leq 0.05$ , \*\*\* $p \leq 0.001$ .

490

491 **Fig 3. NLP-7 and TGF- $\beta$ /DAF-7 modulate the decision to leave the OP50 food lawn paired**  
492 **with 2-nonanone.**

493 **(A-D)** The mutant animals that are defective in the biosynthesis of the neurotransmitter  
494 serotonin (**A**, *tph-1(mg280)*, n = 2 assays each), or dopamine (**B**, *cat-2(e1112)*, n = 4 assays  
495 each), or tyramine and octopamine (**C**, *tdc-1(n3419)*, n = 2 assays each), or octopamine (**D**, *tbh-*  
496 *1(n3247)*, n = 3 and 4 assays for wild type and *tbh-1* mutants, respectively) display a normal  
497 decision to leave the OP50 food lawn that is paired with 2-nonanone.

498 **(E-K)** Mutations in the genes encoding the neuropeptide processing enzymes, *kpc-1* (**E**, n = 4  
499 and 5 assays for wild type and *kpc-1* mutant, respectively), or *egl-3* (**F**, n = 4 and 6 assays for  
500 wild type and *egl-3* mutant, respectively), or a TGF- $\beta$  -encoding gene *daf-7* (**G**, n = 6 and 5  
501 assays for wild type and *daf-7* mutant, respectively), or a neuropeptide-encoding gene *nlp-7* (**H**,  
502 n = 7 and 8 assays for wild type and *nlp-7* mutant, respectively) generate a delayed decision to

503 leave the OP50 food lawn paired with 2-nonanone, and expressing the genomic DNA of *nlp-7* (**I**,  
504  $n = 6, 7$  and 4 assays for wild type, transgenic animals and non-transgenic siblings,  
505 respectively) or *daf-7* (**J**,  $n = 4$  assays each for wild type, transgenic animals and non-transgenic  
506 siblings) rescues the delayed food leaving phenotype of the respective mutant animals.  
507 **K**) Expressing the wild-type *daf-7* cDNA in the sensory neurons ADE rescues the delayed  
508 decision in the *daf-7(e1372)* mutant animals,  $n = 4$  assays each for wild type, transgenic  
509 animals and non-transgenic siblings, respectively.  
510 **L**) Expressing the wild-type *daf-7* cDNA in the sensory neurons OLQ also rescues the delayed  
511 decision in the *daf-7(e1372)* mutant animals,  $n = 3$  assays for wild type, 3 assays for transgenic  
512 animals and 2 assays for non-transgenic siblings, respectively.  
513 Each bar graph reports the average percentage of worms outside the lawn 15 minutes after the  
514 start of the assay, mutants are compared with wild-type animals and transgenic animals are  
515 compared with non-transgenic siblings using Student's *t*-test, \*  $p \leq 0.05$ , \*\*  $p \leq 0.01$ , \*\*\* $p \leq$   
516 0.001, n.s., not significant.

517

518 **Fig 4. The TGF- $\beta$  receptor DAF-1 acts in the RIM and RIC neurons to mediate 2-**  
519 **nonanone-dependent food leaving.**

520 **(A-D)** Mutating *daf-1* that encodes the type I TGF- $\beta$  receptor delays the decision to leave the  
521 OP50 lawn paired with 100% 2-nonanone (**A**,  $n = 8$  assays each), and expressing the genomic  
522 DNA of *daf-1* (**B**,  $n = 6$  assays each) or a wild-type *daf-1* cDNA in the RIM and RIC neurons (**C**,  
523  $n = 6, 6$  and 5 assays for wild type, transgenic animals and non-transgenic siblings,  
524 respectively) in the *daf-1(m40)* mutant animals rescues the delayed decision, but expressing  
525 wild-type *daf-1* in the sensory neurons (**D**,  $n = 3, 5$  and 2 assays for wild type, transgenic  
526 animals and non-transgenic siblings, respectively) does not rescue. Mutants are compared with  
527 wild type and transgenic animals are compared with non-transgenic siblings with Student *t*-test.

528 **(E-F)** Inhibiting the activity of the RIM and RIC neurons by selectively expressing a histamine-  
529 gated chloride channel (**E**, n = 2 and 4 assays for wild type and transgenic animals,  
530 respectively) or blocking the synaptic release from these neurons by selectively expressing the  
531 tetanus toxin (**F**, n = 2 assays each) does not alter the decision to leave the OP50 food lawn  
532 paired with 100% 2-nonanone. Transgenic animals are compared with wild type.  
533 **(G-I)** Removing octopamine signaling in the *daf-7(e1372)* or *daf-1(m40)* mutants with a mutation  
534 that disrupt biosynthesis of octopamine *tbh-1(ok1196)* does not suppress the delayed leaving  
535 from the OP50 lawn paired with 100% 2-nonanone (**G**, n = 6 assays for wild type; n = 4 assays  
536 for *daf-7* mutants; n = 2 assays for *daf-1* mutants; n = 3 assays for *daf-7;tbh-1* double mutants;  
537 n = 2 assays for *daf-1;tbh-1* double mutants), but removing the tyramine and the octopamine  
538 signals with the mutation in *tdc-1(ok914)* in either the *daf-7(e1372)* (**H**, n = 6, 5 and 4 assays for  
539 wild type, *daf-7* mutants and *daf-7;tdc-1* double mutants, respectively) or the *daf-1(m40)* (**I**, n =  
540 5, 4 and 5 assays for wild type, *daf-1* mutants and *daf-1;tdc-1* double mutants, respectively)  
541 mutant animals suppresses the delay-decision phenotype in either of the mutant animals.  
542 Double mutants were compared with the respective single mutants using student's *t* test.  
543 Each bar graph reports the average percentage of worms outside the lawn 15 minutes after the  
544 start of the assay. Mean  $\pm$  SEM, \*\*  $p \leq 0.01$ , \*\*\*  $p \leq 0.001$ , n.s.; not significant.

545

### 546 **Fig 5. Downstream circuit that regulates 2-nonanone-dependent food leaving**

547 **(A-C)** Inhibiting the activity of the AIY interneuron by expressing the gain-of-function isoform of  
548 the potassium channel TWK-18 (**A**, *Pttx-3::twk-18(gf)*, n = 3 assays each) or by blocking the  
549 synaptic outputs of AIY by expressing tetanus toxin (**B**, *Pttx-3::TeTx*, n = 4 assays each), or the  
550 mutation *ttx-3(mg158)* that generates development defects in AIY (**C**, n = 3 assays each) delays  
551 the decision to leave the OP50 lawn paired with 100% 2-nonanone.

552 **(D, E)** Selectively expressing tetanus toxin (**D**, *Pinx-1::TeTx*, n = 2 assays each) or the inhibitory  
553 HisCl channel (**E**, *Pinx-1::HisCl*, n = 3 and 4 assays for wild type and transgenic animals,  
554 respectively) in the AIB interneuron does not significantly alter the lawn-leaving decision, when  
555 the OP50 lawn is paired with 100% 2-nonanone.  
556 **(F, G)** Blocking synaptic outputs from the *nmr-1*-expressing neurons (**F**, *Pnmr-1::TeTx*, n = 3  
557 assays each) or the *glr-1*-expressing neurons (**G**, *Pglr-1::TeTx*, n = 4 and 3 assays for wild type  
558 and transgenic animals, respectively) enhanced the 2-nonanone-dependent lawn leaving.  
559 Each bar graph reports the average percentage of worms outside the lawn 15 minutes after the  
560 start of the assay. Mean  $\pm$  SEM, mutants are compared with wild-type animals with student's *t*  
561 test, transgenic animals are compared with non-transgenic siblings with student's *t*-test, \*  $p \leq$   
562 0.05, \*\*  $p \leq 0.01$ , \*\*\*  $p \leq 0.001$ , n.s., not significant.

563

564 **Fig 6. Integrated response to a repellent-paired food lawn is regulated by a common set**  
565 **of factors.**

566 **(A)** Wild-type animals also leave the lawn of OP50 paired with 100% benzaldehyde; in contrast,  
567 pairing an OP50 lawn with either 100% octanol does not repel worms (n = 2 assays for each  
568 condition).

569 **(B-E)** Genetic ablation of the sensory neuron AWB (**B**, *pAWB::mec-4(d)*, n = 3 assays each) or  
570 ASK (**C**, *pASK::caspase*, n = 3 assays each) or mutating the genetic components of the TGF-  
571  $\beta$ /DAF-7 pathway (**D**, *daf-7(e1372)*, n = 3 assays each; **E**, *daf-1(m40)*, n = 4 assays each) alters  
572 the decision to leave the benzaldehyde-paired OP50 lawn.

573 Each bar graph reports the average percentage of worms outside the lawn 25 minutes (**B, D, E**)  
574 or 5 minutes (**C**) after the start of the assay. Mean  $\pm$  SEM, mutants are compared with wild-type  
575 animals with Student's *t* test, \*\*  $p \leq 0.01$ , \*\*\*  $p \leq 0.001$ , n.s., not significant.

576



577 **Fig 7. Integrated response to a repellent-paired food lawn requires a common set of**  
578 **factors.**

579 **(A-D)** Genetic ablation of the sensory neuron AWB (**A**, *pAWB::mec-4(d)*, n = 2 assays each) or  
580 ASK (**B**, *pASK::caspase*, n = 2 assays each), or mutating the genetic components of the TGF-  
581  $\beta$ /DAF-7 pathway (**C**, *daf-7(e1372)*, n = 4 assays each; **D**, *daf-1(m40)*, n = 2 assays each) alters  
582 the decision to leave the 2-nonanone-paired *Comamonas* lawn.

583 Each bar graph reports the average percentage of worms outside the lawn 25 minutes (**A**) or 20  
584 minutes (**B-D**) after the start of the assay. Mean  $\pm$  SEM, mutants or transgenic animals are  
585 compared with wild type with Student's *t* test, \*  $p \leq 0.05$ , \*\*  $p \leq 0.01$ .

586

587 **Methods**

588 **Strains**

589 *C. elegans* strains were cultivated under the standard conditions [116]. Hermaphrodites were  
590 used in this study. The strains that were used in the study include: PR680 *che-1(p680)I*,  
591 CX14394 *npr-5(ok1583)V*, MT15434 *tph-1(mg280)II*, CB1112 *cat-2(e1112)II*, MT9455 *tbh-*  
592 *1(n3247)X*, RB1161 *tbh-1(ok1196)X*, RB993 *tdc-1(ok914)II*, MT13113 *tdc-1(n3419)II*, DR40 *daf-*  
593 *1(m40)IV*, PR691 *tax-2(p691)I*, PR671 *tax-2(p671)I*, RB859 *daf-22(ok693)II*, OH8 *ttx-*  
594 *3(mg158)X*, MT150 *egl-3(n150)V*, CX4 *odr-7(ky4)X*, CX03572 *nlp-9(tm3579)V*, ZC2685 *npr-*  
595 *2(ok419)IV*, VC48 *kpc-1(gk8)I*, RB1341 *nlp-1(ok1470)X*, RB1289 *npr-18(ok1388)X*, CB1372  
596 *daf-7(e1372)III*, ZC2673 *gcy-33(ok232)V*, SM2322 *daf-7(ok3125)III*, AX1295 *gcy-35(ok769)I*,  
597 QZ81 *ins-6(tm2416)II*, QZ126 *ins-7(tm2001)IV*, FX02105 *nlp-24(tm2105)V*, RB1902 *flp-*  
598 *19(ok2460)x*, CX10 *osm-9(ky10)IV*, FX02984 *nlp-7(tm2984)X*, RB1161 *tbh-1(ok1196)X*, RB993  
599 *tdc-1(ok914)II*, KQ361 *tdc-1(ok914)II*; *daf-7(e1372)III*, KQ363 *tdc-1(ok914)II*; *daf-1(m40)IV*,  
600 KQ364 *daf-1(m40)IV*; *tbh-1(ok1196)X*, KQ362 *daf-7(e1372)III*; *tbh-1(ok1196)X*, ZC1952  
601 *yxIs25[Pttx-3::TeTx::mCherry; Punc-122::gfp]*, KQ280 *daf-1(m40)IV*; *ftEx98[Pdaf-1::daf-1::gfp;*

602 *Podr-1::dsRed*], KQ380 *daf-1(m40)IV; ftEx205[Ptdc-1::daf-1::gfp; Podr-1::dsRed]*, KQ252 *daf-*  
603 *1(m40)IV; ftEx70[Pbbs-1::daf-1::gfp; Podr-1::dsRed]*, ZD736 *daf-7(ok3125)III;qdEx44[Pstr-*  
604 *3p::daf-7; Pges-1::gfp]*, ZD729 *daf-7(ok3125)III;qdEx37[Pdaf-7::daf-7; Pges-1::gfp]*, PY7502  
605 *yxIs34[Pceh-36 $\nabla$ ::TU813; Pceh-36 $\nabla$ ::TU814; Psrtx-1::gfp; Punc-122::dsRed]*, ZC2393  
606 *yxEx1248 [Pttx-3::twk-18(gf)::mCherry; Punc-122::RFP]*, CX14848 *kyEx4866[Pinx-*  
607 *1::HisCl1::SL2mCherry; Punc-122::dsRed]*, CX16040 *kyEx5464[Ptdc-1::HisCl1::SL2mCherry]*,  
608 ZC1451 *yxEx699[Pnmr-1::TeTx::mCherry; Punc-122::dsRED]*; QS4 *qrls2[Psra-9::mCasp1;*  
609 *Psra-9::gfp; Pelt-2::gfp]*, PS6025 *qrls2[Psra-9::mCasp1; Psra-9::gfp; Pelt-2::gfp]*; ZC1552  
610 *yxEx749[Pglr-1::TeTx::mCherry; Punc-122::gfp]*, PY7505 *oyIs84[Pgpa-4::TU813; Pgcy-*  
611 *27::TU814; Pgcy-27::gfp; Punc-122::dsRed]*, CX3830 *kyls102V; kyls104[Pstr-1::mec-4(d); Pstr-*  
612 *1::gfp]*; CX14637 *kyEx4779[Pinx-1::TeTx::mCherry; Punc-122::gfp]*, CX14993 *kyEx4962[Ptdc-*  
613 *1::TeTx::mCherry]*, AX2051 *Ex[Pgcy-33::egl-1; Punc-122::dsRed]*, CX12330 *Ex[Psre-*  
614 *1::TeTx::mCherry; Punc-122::RFP]*, CX7102 *lin-15B(n765)X; qals2241[Pgcy-36::egl-1; Pgcy-*  
615 *35::gfp; lin-15(+)]*, ZC2752 *nlp-7(tm2984)X; yxEx1420[Pnlp-7::nlp-7; Punc-122::gfp]*, ZC2731  
616 *daf-7(e1372)III; yxEx1409[Pcat-2::daf-7; Punc-122::gfp]*; ZC2734 *daf-7(e1372)III,*  
617 *yxEx1412[Pocr-4::daf-7; Punc-122::gfp]*

618

### 619 **Behavioral assay for multisensory integration**

620 On a 5 cm-diameter NGM (Nematode Growth Medium) plate, 20-25 young adult worms were  
621 placed on a small 1 cm-diameter round-shaped bacterial lawn made of freshly cultivated *E. coli*  
622 OP50 strain and left to acclimatize on the lawn for 1-2 hour. Next, a drop of 1  $\mu$ l 2-nonanone  
623 (Sigma Aldrich, Cat # 821-55-6), either 10% (v/v in 100% ethanol) or 100%, was placed on the  
624 right-hand side of the lawn and 3 mm away from the lawn. The number of worms on the lawn  
625 was counted every 5 minutes for a total of 60 minutes, and the percentage of worms outside the  
626 lawn was calculated (Figure 1A and 1B). In some assays, 1  $\mu$ l of 100% benzaldehyde (Sigma  
627 Aldrich, Cat # 100-52-7) was used, instead of 2-nonanone. The OP50 culture was prepared

628 freshly each day by culturing at 27°C for 12-15 hours in NGM medium. For assays using  
629 *Comamonas sp* for the food lawn, the experiments were performed in the same way, except  
630 that the bacterial strain was cultured with Luria Broth. To determine the time taken to reach the  
631 edge of the food lawn, the food lawn was divided into 5 columns with each being 2 mm wide (S5  
632 Fig). The time taken for 90% of the worms to crawl into the column furthest away from the  
633 repellent was recorded. Mutants were compared with wild-type animals tested in parallel, and  
634 transgenic animals were compared with non-transgenic siblings or wild-type animals tested in  
635 parallel on the same day.

636  
637 The bar graphs in the figures report the percentage of worms outside the lawn at the time point  
638 when the significant difference between the tested genotypes was first observed. When there  
639 was no significant difference, the bar graphs report the percentage of worms outside the lawn  
640 15 minutes after the start of the assay.

641  
642 **Transgenes and transgenic animals**  
643 To generate a *nlp-7* genomic rescue fragment, a 4.7 kb PCR product was amplified from  
644 genomic DNA that included 2.5 kb 5' upstream sequence, the *nlp-7* coding region, and 1 kb 3'  
645 downstream sequence (NLP-7F: 5'-CATGTTTTTGATCATTTTCGAAC-'3 and NLP-7R3'UTR: 5'-  
646 AATATCGTATGCCAACTTGAAC-'3). The *nlp-7* genomic PCR product was injected into the *nlp-*  
647 *7(tm2984)* animals. To generate the construct expressing a wild-type *daf-7* cDNA in the OLQ or  
648 ADE sensory neurons, the *daf-7* cDNA was amplified from PJM016 (Gift from Dr. Dennis Kim  
649 and Dr. Joshua Meisel [71]). The *daf-7* cDNA product was cloned into a gateway destination  
650 vector that contained an *unc-54* 3'UTR using the Nhe-1 and Kpn-1 sites. Both the promoter  
651 regions of *ocr-4* (4.0 kb promoter for expression in OLQ) and *cat-2* (1.1 kb promoter for  
652 expression in ADE) were amplified from genomic DNA (CAT-2F:  
653 CTAGCAGGCCCAATCTTTTCTG and CAT-2R: TCCTCTTCCAATTTTCAAGGGGT/OCR-4F:

654 5'-TTCTAATATTGCTCCATCAAC-3 and OCR-4R: 5'-TAATACAAGTTAGATTCAGAGAATA-3)  
655 and cloned into the entry-TOPO vector PCR8 (Invitrogen). The expression clones, *Pcat-2::daf-7*  
656 and *Pocr-4::daf-7*, were generated using LR recombination reactions (Invitrogen). Each  
657 transgene was injected at 30-50 ng/μl with the co-injection marker as previously described  
658 [117].

659

### 660 **Lawn-leaving assay**

661 Lawn-leaving assay was performed and analyzed similarly as the assay for multisensory  
662 integration, except that no repulsive chemical was present. Briefly, animals were placed on a 1  
663 cm-diameter round-shaped bacterial lawn of OP50 and left for 10 minutes to acclimatize before  
664 examining food leaving over a period of one hour by counting the number of worms that were  
665 present on the food lawn every 5 minutes for a total of 60 minutes.

666

### 667 **2-nonanone avoidance assay**

668 To examine the avoidance of 2-nonanone, chemotaxis assays were performed essentially as  
669 previously described [43]. Briefly, animals were placed in the center of a square plate that was  
670 divided into sectors A - F and 2 drops of 1 μl of 2-nonanone was added to one side and 2 drops  
671 of 1 μl ethanol was added to the opposite side of the plate as control. Approximately 100 worms  
672 were used in each assay. Chemotactic avoidance was analyzed by counting the number of  
673 worms in the sectors A-B, C-D and E-F with E-F being furthest away from the 2-nonanone point  
674 sources (S5 Fig). The avoidance index was calculated as the number of animals in sectors A  
675 and B minus the number of animals in the sectors E and F and normalized with the total number  
676 of animals in all 6 sectors on plate.

677

### 678 **Acknowledgements**

679 We would like to thank Drs. Kevah Ashrafi, Cori Bargmann, Dennis Kim, Richard Komuniecki  
680 and Piali Sengupta for sharing reagents. We also thank members of the Zhang lab for insightful  
681 discussion for this project. The research in the Zhang lab is supported by Harvard University  
682 (PRISE program for G.L.) and The National Institutes of Health (NIH).

683

684 **The authors declare no competing interest.**

685

## 686 **References**

687

- 688 1. Ohyama T, Schneider-Mizell CM, Fetter RD, Aleman JV, Franconville R, Rivera-Alba M,  
689 et al. A multilevel multimodal circuit enhances action selection in *Drosophila*. *Nature*.  
690 2015;520(7549):633-9. doi: 10.1038/nature14297. PubMed PMID: 25896325.
- 691 2. Ravi S, Garcia JE, Wang C, Dyer AG. The answer is blowing in the wind: free-flying  
692 honeybees can integrate visual and mechano-sensory inputs for making complex foraging  
693 decisions. *J Exp Biol*. 2016;219(Pt 21):3465-72. doi: 10.1242/jeb.142679. PubMed PMID:  
694 27591315.
- 695 3. Ghosh DD, Sanders T, Hong S, McCurdy LY, Chase DL, Cohen N, et al. Neural  
696 Architecture of Hunger-Dependent Multisensory Decision Making in *C. elegans*. *Neuron*.  
697 2016;92(5):1049-62. doi: 10.1016/j.neuron.2016.10.030. PubMed PMID: 27866800; PubMed  
698 Central PMCID: PMC5147516.
- 699 4. Bargmann CI, Marder E. From the connectome to brain function. *Nat Methods*.  
700 2013;10(6):483-90. PubMed PMID: 23866325.
- 701 5. Sanchez-Alcaniz JA, Benton R. Multisensory neural integration of chemical and  
702 mechanical signals. *Bioessays*. 2017;39(8). doi: 10.1002/bies.201700060. PubMed PMID:  
703 28621811.
- 704 6. Chandrasekaran C. Computational principles and models of multisensory integration.  
705 *Curr Opin Neurobiol*. 2017;43:25-34. doi: 10.1016/j.conb.2016.11.002. PubMed PMID:  
706 27918886; PubMed Central PMCID: PMC5447489.
- 707 7. Stein BE, Stanford TR, Rowland BA. Development of multisensory integration from the  
708 perspective of the individual neuron. *Nat Rev Neurosci*. 2014;15(8):520-35. PubMed PMID:  
709 25158358; PubMed Central PMCID: PMC4215474.
- 710 8. Yau JM, DeAngelis GC, Angelaki DE. Dissecting neural circuits for multisensory  
711 integration and crossmodal processing. *Philos Trans R Soc Lond B Biol Sci*.  
712 2015;370(1677):20140203. doi: 10.1098/rstb.2014.0203. PubMed PMID: 26240418; PubMed  
713 Central PMCID: PMC4528815.
- 714 9. Rolls ET, Grabenhorst F, Parris BA. Neural systems underlying decisions about affective  
715 odors. *J Cogn Neurosci*. 2010;22(5):1069-82. doi: 10.1162/jocn.2009.21231. PubMed PMID:  
716 19320548.
- 717 10. Shiraiwa T. Multimodal chemosensory integration through the maxillary palp in  
718 *Drosophila*. *PLoS One*. 2008;3(5):e2191. doi: 10.1371/journal.pone.0002191. PubMed PMID:  
719 18478104; PubMed Central PMCID: PMC2364657.

- 720 11. Verhagen JV, Engelen L. The neurocognitive bases of human multimodal food  
721 perception: sensory integration. *Neurosci Biobehav Rev.* 2006;30(5):613-50. doi:  
722 10.1016/j.neubiorev.2005.11.003. PubMed PMID: 16457886.
- 723 12. Bardgett ME, Depenbrock M, Downs N, Points M, Green L. Dopamine modulates effort-  
724 based decision making in rats. *Behav Neurosci.* 2009;123(2):242-51. doi: 10.1037/a0014625.  
725 PubMed PMID: 19331447; PubMed Central PMCID: PMCPMC2791340.
- 726 13. Stopper CM, Tse MTL, Montes DR, Wiedman CR, Floresco SB. Overriding phasic  
727 dopamine signals redirects action selection during risk/reward decision making. *Neuron.*  
728 2014;84(1):177-89. doi: 10.1016/j.neuron.2014.08.033. PubMed PMID: 25220811.
- 729 14. Birren SJ, Marder E. Neuroscience. Plasticity in the neurotransmitter repertoire. *Science.*  
730 2013;340(6131):436-7. doi: 10.1126/science.1238518. PubMed PMID: 23620040.
- 731 15. Damier P. Why do Parkinson's Disease Patients Sometimes Make Wrong Decisions? *J*  
732 *Parkinsons Dis.* 2015;5(3):637-42. doi: 10.3233/JPD-150600. PubMed PMID: 26406144.
- 733 16. Pedersen A, Goder R, Tomczyk S, Ohrmann P. Risky decision-making under risk in  
734 schizophrenia: A deliberate choice? *J Behav Ther Exp Psychiatry.* 2017;56:57-64. doi:  
735 10.1016/j.jbtep.2016.08.004. PubMed PMID: 27568887.
- 736 17. Brandwein AB, Foxe JJ, Butler JS, Russo NN, Altschuler TS, Gomes H, et al. The  
737 development of multisensory integration in high-functioning autism: high-density electrical  
738 mapping and psychophysical measures reveal impairments in the processing of audiovisual  
739 inputs. *Cereb Cortex.* 2013;23(6):1329-41. doi: 10.1093/cercor/bhs109. PubMed PMID:  
740 22628458; PubMed Central PMCID: PMCPMC3643715.
- 741 18. Yeap S, Kelly SP, Reilly RB, Thakore JH, Foxe JJ. Visual sensory processing deficits in  
742 patients with bipolar disorder revealed through high-density electrical mapping. *J Psychiatry*  
743 *Neurosci.* 2009;34(6):459-64. PubMed PMID: 19949722; PubMed Central PMCID:  
744 PMCPMC2783437.
- 745 19. Manita S, Suzuki T, Homma C, Matsumoto T, Odagawa M, Yamada K, et al. A Top-  
746 Down Cortical Circuit for Accurate Sensory Perception. *Neuron.* 2015;86(5):1304-16. doi:  
747 10.1016/j.neuron.2015.05.006. PubMed PMID: 26004915.
- 748 20. Talsma D, Senkowski D, Soto-Faraco S, Woldorff MG. The multifaceted interplay  
749 between attention and multisensory integration. *Trends Cogn Sci.* 2010;14(9):400-10. doi:  
750 10.1016/j.tics.2010.06.008. PubMed PMID: 20675182; PubMed Central PMCID:  
751 PMCPMC3306770.
- 752 21. Carmona S, Hoekzema E, Castellanos FX, Garcia-Garcia D, Lage-Castellanos A, Van  
753 Dijk KR, et al. Sensation-to-cognition cortical streams in attention-deficit/hyperactivity disorder.  
754 *Hum Brain Mapp.* 2015;36(7):2544-57. doi: 10.1002/hbm.22790. PubMed PMID: 25821110;  
755 PubMed Central PMCID: PMCPMC4484811.
- 756 22. Gray JM, Hill JJ, Bargmann CI. A circuit for navigation in *Caenorhabditis elegans*. *Proc*  
757 *Natl Acad Sci U S A.* 2005;102(9):3184-91. doi: 10.1073/pnas.0409009101. PubMed PMID:  
758 15689400; PubMed Central PMCID: PMCPMC546636.
- 759 23. Sawin ER, Ranganathan R, Horvitz HR. *C. elegans* locomotory rate is modulated by the  
760 environment through a dopaminergic pathway and by experience through a serotonergic  
761 pathway. *Neuron.* 2000;26(3):619-31. PubMed PMID: 10896158.
- 762 24. Bargmann CI, Hartweg E, Horvitz HR. Odorant-selective genes and neurons mediate  
763 olfaction in *C. elegans*. *Cell.* 1993;74(3):515-27. PubMed PMID: 8348618.
- 764 25. Bargmann CI, Horvitz HR. Chemosensory neurons with overlapping functions direct  
765 chemotaxis to multiple chemicals in *C. elegans*. *Neuron.* 1991;7(5):729-42. PubMed PMID:  
766 1660283.
- 767 26. Chalfie M, Sulston JE, White JG, Southgate E, Thomson JN, Brenner S. The neural  
768 circuit for touch sensitivity in *Caenorhabditis elegans*. *J Neurosci.* 1985;5(4):956-64. PubMed  
769 PMID: 3981252.

- 770 27. Gray JM, Karow DS, Lu H, Chang AJ, Chang JS, Ellis RE, et al. Oxygen sensation and  
771 social feeding mediated by a *C. elegans* guanylate cyclase homologue. *Nature*.  
772 2004;430(6997):317-22. doi: 10.1038/nature02714. PubMed PMID: 15220933.
- 773 28. Cheung BH, Cohen M, Rogers C, Albayram O, de Bono M. Experience-dependent  
774 modulation of *C. elegans* behavior by ambient oxygen. *Curr Biol*. 2005;15(10):905-17. doi:  
775 10.1016/j.cub.2005.04.017. PubMed PMID: 15916947.
- 776 29. Bretscher AJ, Busch KE, de Bono M. A carbon dioxide avoidance behavior is integrated  
777 with responses to ambient oxygen and food in *Caenorhabditis elegans*. *Proc Natl Acad Sci U S*  
778 *A*. 2008;105(23):8044-9. doi: 10.1073/pnas.0707607105. PubMed PMID: 18524954; PubMed  
779 Central PMCID: PMCPMC2410288.
- 780 30. Hallem EA, Sternberg PW. Acute carbon dioxide avoidance in *Caenorhabditis elegans*.  
781 *Proc Natl Acad Sci U S A*. 2008;105(23):8038-43. doi: 10.1073/pnas.0707469105. PubMed  
782 PMID: 18524955; PubMed Central PMCID: PMCPMC2430355.
- 783 31. Kaplan JM, Horvitz HR. A dual mechanosensory and chemosensory neuron in  
784 *Caenorhabditis elegans*. *Proc Natl Acad Sci U S A*. 1993;90(6):2227-31. PubMed PMID:  
785 8460126; PubMed Central PMCID: PMCPMC46059.
- 786 32. Ghosh DD, Nitabach MN, Zhang Y, Harris G. Multisensory integration in *C. elegans*.  
787 *Curr Opin Neurobiol*. 2017;43:110-8. doi: 10.1016/j.conb.2017.01.005. PubMed PMID:  
788 28273525; PubMed Central PMCID: PMCPMC5501174.
- 789 33. Hao Y, Yang W, Ren J, Hall Q, Zhang Y, Kaplan JM. Thioredoxin shapes the *C. elegans*  
790 sensory response to *Pseudomonas* produced nitric oxide. *Elife*. 2018;7. Epub 2018/07/18. doi:  
791 10.7554/eLife.36833. PubMed PMID: 30014846; PubMed Central PMCID: PMCPMC6066330.
- 792 34. Flavell SW, Pokala N, Macosko EZ, Albrecht DR, Larsch J, Bargmann CI. Serotonin and  
793 the neuropeptide PDF initiate and extend opposing behavioral states in *C. elegans*. *Cell*.  
794 2013;154(5):1023-35. doi: 10.1016/j.cell.2013.08.001. PubMed PMID: 23972393; PubMed  
795 Central PMCID: PMCPMC3942133.
- 796 35. Harris G, Mills H, Wragg R, Hapiak V, Castelletto M, Korchnak A, et al. The  
797 monoaminergic modulation of sensory-mediated aversive responses in *Caenorhabditis elegans*  
798 requires glutamatergic/peptidergic cotransmission. *J Neurosci*. 2010;30(23):7889-99. doi:  
799 10.1523/JNEUROSCI.0497-10.2010. PubMed PMID: 20534837; PubMed Central PMCID:  
800 PMCPMC3005568.
- 801 36. Ezcurra M, Tanizawa Y, Swoboda P, Schafer WR. Food sensitizes *C. elegans*  
802 avoidance behaviours through acute dopamine signalling. *EMBO J*. 2011;30(6):1110-22. doi:  
803 10.1038/emboj.2011.22. PubMed PMID: 21304491; PubMed Central PMCID:  
804 PMCPMC3061029.
- 805 37. Komuniecki R, Hapiak V, Harris G, Bamber B. Context-dependent modulation  
806 reconfigures interactive sensory-mediated microcircuits in *Caenorhabditis elegans*. *Curr Opin*  
807 *Neurobiol*. 2014;29:17-24. doi: 10.1016/j.conb.2014.04.006. PubMed PMID: 24811318.
- 808 38. de Bono M, Maricq AV. Neuronal substrates of complex behaviors in *C. elegans*. *Annu*  
809 *Rev Neurosci*. 2005;28:451-501. doi: 10.1146/annurev.neuro.27.070203.144259. PubMed  
810 PMID: 16022603.
- 811 39. Bargmann CI. Neurobiology of the *Caenorhabditis elegans* genome. *Science*.  
812 1998;282(5396):2028-33. PubMed PMID: 9851919.
- 813 40. White JG, Southgate E, Thomson JN, Brenner S. The structure of the nervous system of  
814 the nematode *Caenorhabditis elegans*. *Philos Trans R Soc Lond B Biol Sci*. 1986;314(1165):1-  
815 340. PubMed PMID: 22462104.
- 816 41. Shtonda BB, Avery L. Dietary choice behavior in *Caenorhabditis elegans*. *J Exp Biol*.  
817 2006;209(Pt 1):89-102. doi: 10.1242/jeb.01955. PubMed PMID: 16354781; PubMed Central  
818 PMCID: PMCPMC1352325.
- 819 42. Bendesky A, Tsunozaki M, Rockman MV, Kruglyak L, Bargmann CI. Catecholamine  
820 receptor polymorphisms affect decision-making in *C. elegans*. *Nature*. 2011;472(7343):313-8.

- 821 doi: 10.1038/nature09821. PubMed PMID: 21412235; PubMed Central PMCID:  
822 PMCPMC3154120.
- 823 43. Troemel ER, Kimmel BE, Bargmann CI. Reprogramming chemotaxis responses:  
824 sensory neurons define olfactory preferences in *C. elegans*. *Cell*. 1997;91(2):161-9. PubMed  
825 PMID: 9346234.
- 826 44. Ha HI, Hendricks M, Shen Y, Gabel CV, Fang-Yen C, Qin Y, et al. Functional  
827 organization of a neural network for aversive olfactory learning in *Caenorhabditis elegans*.  
828 *Neuron*. 2010;68(6):1173-86. doi: 10.1016/j.neuron.2010.11.025. PubMed PMID: 21172617;  
829 PubMed Central PMCID: PMCPMC3038580.
- 830 45. Tanimoto Y, Yamazoe-Umemoto A, Fujita K, Kawazoe Y, Miyanishi Y, Yamazaki SJ, et  
831 al. Calcium dynamics regulating the timing of decision-making in *C. elegans*. *Elife*. 2017;6. doi:  
832 10.7554/eLife.21629. PubMed PMID: 28532547; PubMed Central PMCID: PMCPMC5441874.
- 833 46. Fetsch CR, DeAngelis GC, Angelaki DE. Bridging the gap between theories of sensory  
834 cue integration and the physiology of multisensory neurons. *Nat Rev Neurosci*. 2013;14(6):429-  
835 42. doi: 10.1038/nrn3503. PubMed PMID: 23686172; PubMed Central PMCID:  
836 PMCPMC3820118.
- 837 47. Bianchi L, Gerstbrein B, Frokjaer-Jensen C, Royal DC, Mukherjee G, Royal MA, et al.  
838 The neurotoxic MEC-4(d) DEG/ENaC sodium channel conducts calcium: implications for  
839 necrosis initiation. *Nat Neurosci*. 2004;7(12):1337-44. doi: 10.1038/nn1347. PubMed PMID:  
840 15543143.
- 841 48. Chalasani SH, Chronis N, Tsunozaki M, Gray JM, Ramot D, Goodman MB, et al.  
842 Dissecting a circuit for olfactory behaviour in *Caenorhabditis elegans*. *Nature*.  
843 2007;450(7166):63-70. doi: 10.1038/nature06292. PubMed PMID: 17972877.
- 844 49. Milward K, Busch KE, Murphy RJ, de Bono M, Olofsson B. Neuronal and molecular  
845 substrates for optimal foraging in *Caenorhabditis elegans*. *Proc Natl Acad Sci U S A*.  
846 2011;108(51):20672-7. doi: 10.1073/pnas.1106134109. PubMed PMID: 22135454; PubMed  
847 Central PMCID: PMCPMC3251049.
- 848 50. Calhoun AJ, Tong A, Pokala N, Fitzpatrick JA, Sharpee TO, Chalasani SH. Neural  
849 Mechanisms for Evaluating Environmental Variability in *Caenorhabditis elegans*. *Neuron*.  
850 2015;86(2):428-41. doi: 10.1016/j.neuron.2015.03.026. PubMed PMID: 25864633; PubMed  
851 Central PMCID: PMCPMC4409562.
- 852 51. Zaslaver A, Liani I, Shtangel O, Ginzburg S, Yee L, Sternberg PW. Hierarchical sparse  
853 coding in the sensory system of *Caenorhabditis elegans*. *Proc Natl Acad Sci U S A*.  
854 2015;112(4):1185-9. doi: 10.1073/pnas.1423656112. PubMed PMID: 25583501; PubMed  
855 Central PMCID: PMCPMC4313814.
- 856 52. Sengupta P, Colbert HA, Bargmann CI. The *C. elegans* gene *odr-7* encodes an  
857 olfactory-specific member of the nuclear receptor superfamily. *Cell*. 1994;79(6):971-80. PubMed  
858 PMID: 8001144.
- 859 53. Uchida O, Nakano H, Koga M, Ohshima Y. The *C. elegans* *che-1* gene encodes a zinc  
860 finger transcription factor required for specification of the ASE chemosensory neurons.  
861 *Development*. 2003;130(7):1215-24. PubMed PMID: 12588839.
- 862 54. Conradt B, Horvitz HR. The TRA-1A sex determination protein of *C. elegans* regulates  
863 sexually dimorphic cell deaths by repressing the *egl-1* cell death activator gene. *Cell*.  
864 1999;98(3):317-27. PubMed PMID: 10458607.
- 865 55. Chang AJ, Chronis N, Karow DS, Marletta MA, Bargmann CI. A distributed  
866 chemosensory circuit for oxygen preference in *C. elegans*. *PLoS Biol*. 2006;4(9):e274. doi:  
867 10.1371/journal.pbio.0040274. PubMed PMID: 16903785; PubMed Central PMCID:  
868 PMCPMC1540710.
- 869 56. Zimmer M, Gray JM, Pokala N, Chang AJ, Karow DS, Marletta MA, et al. Neurons detect  
870 increases and decreases in oxygen levels using distinct guanylate cyclases. *Neuron*.



- 871 2009;61(6):865-79. doi: 10.1016/j.neuron.2009.02.013. PubMed PMID: 19323996; PubMed  
872 Central PMCID: PMCPMC2760494.
- 873 57. Hallem EA, Spencer WC, McWhirter RD, Zeller G, Henz SR, Ratsch G, et al. Receptor-  
874 type guanylate cyclase is required for carbon dioxide sensation by *Caenorhabditis elegans*.  
875 Proc Natl Acad Sci U S A. 2011;108(1):254-9. doi: 10.1073/pnas.1017354108. PubMed PMID:  
876 21173231; PubMed Central PMCID: PMCPMC3017194.
- 877 58. Kunkel MT, Johnstone DB, Thomas JH, Salkoff L. Mutants of a temperature-sensitive  
878 two-P domain potassium channel. J Neurosci. 2000;20(20):7517-24. PubMed PMID: 11027209.
- 879 59. Schiavo G, Benfenati F, Poulain B, Rossetto O, Polverino de Laureto P, DasGupta BR,  
880 et al. Tetanus and botulinum-B neurotoxins block neurotransmitter release by proteolytic  
881 cleavage of synaptobrevin. Nature. 1992;359(6398):832-5. doi: 10.1038/359832a0. PubMed  
882 PMID: 1331807.
- 883 60. Beverly M, Anbil S, Sengupta P. Degeneracy and neuromodulation among  
884 thermosensory neurons contribute to robust thermosensory behaviors in *Caenorhabditis*  
885 *elegans*. J Neurosci. 2011;31(32):11718-27. doi: 10.1523/JNEUROSCI.1098-11.2011. PubMed  
886 PMID: 21832201; PubMed Central PMCID: PMCPMC3167209.
- 887 61. Srinivasan J, von Reuss SH, Bose N, Zaslaver A, Mahanti P, Ho MC, et al. A modular  
888 library of small molecule signals regulates social behaviors in *Caenorhabditis elegans*. PLoS  
889 Biol. 2012;10(1):e1001237. doi: 10.1371/journal.pbio.1001237. PubMed PMID: 22253572;  
890 PubMed Central PMCID: PMCPMC3254649.
- 891 62. Cornils A, Gloeck M, Chen Z, Zhang Y, Alcedo J. Specific insulin-like peptides encode  
892 sensory information to regulate distinct developmental processes. Development.  
893 2011;138(6):1183-93. doi: 10.1242/dev.060905. PubMed PMID: 21343369; PubMed Central  
894 PMCID: PMCPMC3042873.
- 895 63. Macosko EZ, Pokala N, Feinberg EH, Chalasani SH, Butcher RA, Clardy J, et al. A hub-  
896 and-spoke circuit drives pheromone attraction and social behaviour in *C. elegans*. Nature.  
897 2009;458(7242):1171-5. doi: 10.1038/nature07886. PubMed PMID: 19349961; PubMed Central  
898 PMCID: PMCPMC2760495.
- 899 64. Jang H, Kim K, Neal SJ, Macosko E, Kim D, Butcher RA, et al. Neuromodulatory state  
900 and sex specify alternative behaviors through antagonistic synaptic pathways in *C. elegans*.  
901 Neuron. 2012;75(4):585-92. doi: 10.1016/j.neuron.2012.06.034. PubMed PMID: 22920251;  
902 PubMed Central PMCID: PMCPMC3462069.
- 903 65. Sze JY, Victor M, Loer C, Shi Y, Ruvkun G. Food and metabolic signalling defects in a  
904 *Caenorhabditis elegans* serotonin-synthesis mutant. Nature. 2000;403(6769):560-4. doi:  
905 10.1038/35000609. PubMed PMID: 10676966.
- 906 66. Calvo AC, Pey AL, Miranda-Vizuete A, Doskeland AP, Martinez A. Divergence in  
907 enzyme regulation between *Caenorhabditis elegans* and human tyrosine hydroxylase, the key  
908 enzyme in the synthesis of dopamine. Biochem J. 2011;434(1):133-41. doi:  
909 10.1042/BJ20101561. PubMed PMID: 21087208.
- 910 67. Alkema MJ, Hunter-Ensor M, Ringstad N, Horvitz HR. Tyramine Functions  
911 independently of octopamine in the *Caenorhabditis elegans* nervous system. Neuron.  
912 2005;46(2):247-60. doi: 10.1016/j.neuron.2005.02.024. PubMed PMID: 15848803.
- 913 68. Kass J, Jacob TC, Kim P, Kaplan JM. The EGL-3 proprotein convertase regulates  
914 mechanosensory responses of *Caenorhabditis elegans*. J Neurosci. 2001;21(23):9265-72.  
915 PubMed PMID: 11717360.
- 916 69. Thacker C, Srayko M, Rose AM. Mutational analysis of bli-4/kpc-4 reveals critical  
917 residues required for proprotein convertase function in *C. elegans*. Gene. 2000;252(1-2):15-25.  
918 PubMed PMID: 10903434.
- 919 70. Thacker C, Rose AM. A look at the *Caenorhabditis elegans* Kex2/Subtilisin-like  
920 proprotein convertase family. Bioessays. 2000;22(6):545-53. doi: 10.1002/(SICI)1521-  
921 1878(200006)22:6<545::AID-BIES7>3.0.CO;2-F. PubMed PMID: 10842308.

- 922 71. Meisel JD, Panda O, Mahanti P, Schroeder FC, Kim DH. Chemosensation of bacterial  
923 secondary metabolites modulates neuroendocrine signaling and behavior of *C. elegans*. *Cell*.  
924 2014;159(2):267-80. doi: 10.1016/j.cell.2014.09.011. PubMed PMID: 25303524; PubMed  
925 Central PMCID: PMCPMC4194030.
- 926 72. Ren P, Lim CS, Johnsen R, Albert PS, Pilgrim D, Riddle DL. Control of *C. elegans* larval  
927 development by neuronal expression of a TGF-beta homolog. *Science*. 1996;274(5291):1389-  
928 91. PubMed PMID: 8910282.
- 929 73. Greer ER, Perez CL, Van Gilst MR, Lee BH, Ashrafi K. Neural and molecular dissection  
930 of a *C. elegans* sensory circuit that regulates fat and feeding. *Cell Metab*. 2008;8(2):118-31. doi:  
931 10.1016/j.cmet.2008.06.005. PubMed PMID: 18680713; PubMed Central PMCID:  
932 PMCPMC2556218.
- 933 74. Park SK, Tedesco PM, Johnson TE. Oxidative stress and longevity in *Caenorhabditis*  
934 *elegans* as mediated by SKN-1. *Aging Cell*. 2009;8(3):258-69. doi: 10.1111/j.1474-  
935 9726.2009.00473.x. PubMed PMID: 19627265; PubMed Central PMCID: PMCPMC2762118.
- 936 75. Park SK, Link CD, Johnson TE. Life-span extension by dietary restriction is mediated by  
937 NLP-7 signaling and coelomocyte endocytosis in *C. elegans*. *FASEB J*. 2010;24(2):383-92. doi:  
938 10.1096/fj.09-142984. PubMed PMID: 19783783; PubMed Central PMCID: PMCPMC2812037.
- 939 76. Banerjee N, Bhattacharya R, Gorczyca M, Collins KM, Francis MM. Local neuropeptide  
940 signaling modulates serotonergic transmission to shape the temporal organization of *C. elegans*  
941 egg-laying behavior. *PLoS Genet*. 2017;13(4):e1006697. doi: 10.1371/journal.pgen.1006697.  
942 PubMed PMID: 28384151; PubMed Central PMCID: PMCPMC5398689.
- 943 77. Mills H, Wragg R, Hapiak V, Castelletto M, Zahratka J, Harris G, et al. Monoamines and  
944 neuropeptides interact to inhibit aversive behaviour in *Caenorhabditis elegans*. *EMBO J*.  
945 2012;31(3):667-78. doi: 10.1038/emboj.2011.422. PubMed PMID: 22124329; PubMed Central  
946 PMCID: PMCPMC3273394.
- 947 78. Georgi LL, Albert PS, Riddle DL. *daf-1*, a *C. elegans* gene controlling dauer larva  
948 development, encodes a novel receptor protein kinase. *Cell*. 1990;61(4):635-45. PubMed PMID:  
949 2160853.
- 950 79. Estevez M, Attisano L, Wrana JL, Albert PS, Massague J, Riddle DL. The *daf-4* gene  
951 encodes a bone morphogenetic protein receptor controlling *C. elegans* dauer larva  
952 development. *Nature*. 1993;365(6447):644-9. doi: 10.1038/365644a0. PubMed PMID: 8413626.
- 953 80. Diana G, Patel DS, Entchev EV, Zhan M, Lu H, Ch'ng Q. Genetic control of encoding  
954 strategy in a food-sensing neural circuit. *Elife*. 2017;6. doi: 10.7554/eLife.24040. PubMed PMID:  
955 28166866; PubMed Central PMCID: PMCPMC5295820.
- 956 81. Entchev EV, Patel DS, Zhan M, Steele AJ, Lu H, Ch'ng Q. A gene-expression-based  
957 neural code for food abundance that modulates lifespan. *Elife*. 2015;4:e06259. doi:  
958 10.7554/eLife.06259. PubMed PMID: 25962853; PubMed Central PMCID: PMCPMC4417936.
- 959 82. Gallagher T, Kim J, Oldenbroek M, Kerr R, You YJ. ASI regulates satiety quiescence in  
960 *C. elegans*. *J Neurosci*. 2013;33(23):9716-24. doi: 10.1523/JNEUROSCI.4493-12.2013.  
961 PubMed PMID: 23739968; PubMed Central PMCID: PMCPMC3726252.
- 962 83. Fletcher M, Kim DH. Age-Dependent Neuroendocrine Signaling from Sensory Neurons  
963 Modulates the Effect of Dietary Restriction on Longevity of *Caenorhabditis elegans*. *PLoS*  
964 *Genet*. 2017;13(1):e1006544. doi: 10.1371/journal.pgen.1006544. PubMed PMID: 28107363;  
965 PubMed Central PMCID: PMCPMC5291536.
- 966 84. Tobin DM, Madsen DM, Kahn-Kirby A, Peckol EL, Moulder G, Barstead R, et al.  
967 Combinatorial expression of TRPV channel proteins defines their sensory functions and  
968 subcellular localization in *C. elegans* neurons. *Neuron*. 2002;35(2):307-18. PubMed PMID:  
969 12160748.
- 970 85. Upadhyay A, Pisupati A, Jegla T, Crook M, Mickolajczyk KJ, Shorey M, et al.  
971 Nicotinamide is an endogenous agonist for a *C. elegans* TRPV OSM-9 and OCR-4 channel. *Nat*

- 972 Commun. 2016;7:13135. doi: 10.1038/ncomms13135. PubMed PMID: 27731314; PubMed  
973 Central PMCID: PMCPMC5064019.
- 974 86. Flames N, Hobert O. Gene regulatory logic of dopamine neuron differentiation. Nature.  
975 2009;458(7240):885-9. doi: 10.1038/nature07929. PubMed PMID: 19287374; PubMed Central  
976 PMCID: PMCPMC2671564.
- 977 87. Gordus A, Pokala N, Levy S, Flavell SW, Bargmann CI. Feedback from network states  
978 generates variability in a probabilistic olfactory circuit. Cell. 2015;161(2):215-27. doi:  
979 10.1016/j.cell.2015.02.018. PubMed PMID: 25772698; PubMed Central PMCID:  
980 PMCPMC4821011.
- 981 88. Tsalik EL, Hobert O. Functional mapping of neurons that control locomotory behavior in  
982 *Caenorhabditis elegans*. J Neurobiol. 2003;56(2):178-97. doi: 10.1002/neu.10245. PubMed  
983 PMID: 12838583.
- 984 89. Hobert O, Mori I, Yamashita Y, Honda H, Ohshima Y, Liu Y, et al. Regulation of  
985 interneuron function in the *C. elegans* thermoregulatory pathway by the *ttx-3* LIM homeobox  
986 gene. Neuron. 1997;19(2):345-57. PubMed PMID: 9292724.
- 987 90. Brockie PJ, Madsen DM, Zheng Y, Melleme J, Maricq AV. Differential expression of  
988 glutamate receptor subunits in the nervous system of *Caenorhabditis elegans* and their  
989 regulation by the homeodomain protein UNC-42. J Neurosci. 2001;21(5):1510-22. PubMed  
990 PMID: 11222641.
- 991 91. Leinwand SG, Yang CJ, Bazopoulou D, Chronis N, Srinivasan J, Chalasani SH. Circuit  
992 mechanisms encoding odors and driving aging-associated behavioral declines in  
993 *Caenorhabditis elegans*. Elife. 2015;4:e10181. doi: 10.7554/eLife.10181. PubMed PMID:  
994 26394000; PubMed Central PMCID: PMCPMC4577979.
- 995 92. Troemel ER, Chou JH, Dwyer ND, Colbert HA, Bargmann CI. Divergent seven  
996 transmembrane receptors are candidate chemosensory receptors in *C. elegans*. Cell.  
997 1995;83(2):207-18. PubMed PMID: 7585938.
- 998 93. Luo L, Gabel CV, Ha HI, Zhang Y, Samuel AD. Olfactory behavior of swimming *C.*  
999 *elegans* analyzed by measuring motile responses to temporal variations of odorants. J  
1000 Neurophysiol. 2008;99(5):2617-25. doi: 10.1152/jn.00053.2008. PubMed PMID: 18367700.
- 1001 94. Olofsson B. The olfactory neuron AWC promotes avoidance of normally palatable food  
1002 following chronic dietary restriction. J Exp Biol. 2014;217(Pt 10):1790-8. doi:  
1003 10.1242/jeb.099929. PubMed PMID: 24577446; PubMed Central PMCID: PMCPMC4020945.
- 1004 95. Wakabayashi T, Kimura Y, Ohba Y, Adachi R, Satoh Y, Shingai R. In vivo calcium  
1005 imaging of OFF-responding ASK chemosensory neurons in *C. elegans*. Biochim Biophys Acta.  
1006 2009;1790(8):765-9. doi: 10.1016/j.bbagen.2009.03.032. PubMed PMID: 19362117.
- 1007 96. Chen Z, Hendricks M, Cornils A, Maier W, Alcedo J, Zhang Y. Two insulin-like peptides  
1008 antagonistically regulate aversive olfactory learning in *C. elegans*. Neuron. 2013;77(3):572-85.  
1009 doi: 10.1016/j.neuron.2012.11.025. PubMed PMID: 23395381; PubMed Central PMCID:  
1010 PMCPMC3569836.
- 1011 97. Chalasani SH, Kato S, Albrecht DR, Nakagawa T, Abbott LF, Bargmann CI.  
1012 Neuropeptide feedback modifies odor-evoked dynamics in *Caenorhabditis elegans* olfactory  
1013 neurons. Nat Neurosci. 2010;13(5):615-21. doi: 10.1038/nn.2526. PubMed PMID: 20364145;  
1014 PubMed Central PMCID: PMCPMC2937567.
- 1015 98. Cohen M, Reale V, Olofsson B, Knights A, Evans P, de Bono M. Coordinated regulation  
1016 of foraging and metabolism in *C. elegans* by RFamide neuropeptide signaling. Cell Metab.  
1017 2009;9(4):375-85. doi: 10.1016/j.cmet.2009.02.003. PubMed PMID: 19356718.
- 1018 99. Harris G, Shen Y, Ha H, Donato A, Wallis S, Zhang X, et al. Dissecting the signaling  
1019 mechanisms underlying recognition and preference of food odors. J Neurosci.  
1020 2014;34(28):9389-403. doi: 10.1523/JNEUROSCI.0012-14.2014. PubMed PMID: 25009271;  
1021 PubMed Central PMCID: PMCPMC4087214.

- 1022 100. Hapiak V, Summers P, Ortega A, Law WJ, Stein A, Komuniecki R. Neuropeptides  
1023 amplify and focus the monoaminergic inhibition of nociception in *Caenorhabditis elegans*. *J*  
1024 *Neurosci.* 2013;33(35):14107-16. doi: 10.1523/JNEUROSCI.1324-13.2013. PubMed PMID:  
1025 23986246; PubMed Central PMCID: PMCPMC3756756.
- 1026 101. Sulston J, Dew M, Brenner S. Dopaminergic neurons in the nematode *Caenorhabditis*  
1027 *elegans*. *J Comp Neurol.* 1975;163(2):215-26. doi: 10.1002/cne.901630207. PubMed PMID:  
1028 240872.
- 1029 102. Chatzigeorgiou M, Schafer WR. Lateral facilitation between primary mechanosensory  
1030 neurons controls nose touch perception in *C. elegans*. *Neuron.* 2011;70(2):299-309. doi:  
1031 10.1016/j.neuron.2011.02.046. PubMed PMID: 21521615; PubMed Central PMCID:  
1032 PMCPMC3145979.
- 1033 103. Harris G, Korchnak A, Summers P, Hapiak V, Law WJ, Stein AM, et al. Dissecting the  
1034 serotonergic food signal stimulating sensory-mediated aversive behavior in *C. elegans*. *PLoS*  
1035 *One.* 2011;6(7):e21897. doi: 10.1371/journal.pone.0021897. PubMed PMID: 21814562;  
1036 PubMed Central PMCID: PMCPMC3140990.
- 1037 104. Ageta H, Ikegami S, Miura M, Masuda M, Migishima R, Hino T, et al. Activin plays a key  
1038 role in the maintenance of long-term memory and late-LTP. *Learn Mem.* 2010;17(4):176-85. doi:  
1039 10.1101/lm.16659010. PubMed PMID: 20332189.
- 1040 105. Goold CP, Davis GW. The BMP ligand *Gbb* gates the expression of synaptic  
1041 homeostasis independent of synaptic growth control. *Neuron.* 2007;56(1):109-23. doi:  
1042 10.1016/j.neuron.2007.08.006. PubMed PMID: 17920019; PubMed Central PMCID:  
1043 PMCPMC2699048.
- 1044 106. Sun M, Thomas MJ, Herder R, Bofenkamp ML, Selleck SB, O'Connor MB. Presynaptic  
1045 contributions of chordin to hippocampal plasticity and spatial learning. *J Neurosci.*  
1046 2007;27(29):7740-50. doi: 10.1523/JNEUROSCI.1604-07.2007. PubMed PMID: 17634368.
- 1047 107. Zhang F, Endo S, Cleary LJ, Eskin A, Byrne JH. Role of transforming growth factor-beta  
1048 in long-term synaptic facilitation in *Aplysia*. *Science.* 1997;275(5304):1318-20. PubMed PMID:  
1049 9036859.
- 1050 108. Tesseur I, Zou K, Esposito L, Bard F, Berber E, Can JV, et al. Deficiency in neuronal  
1051 TGF-beta signaling promotes neurodegeneration and Alzheimer's pathology. *J Clin Invest.*  
1052 2006;116(11):3060-9. doi: 10.1172/JCI27341. PubMed PMID: 17080199; PubMed Central  
1053 PMCID: PMCPMC1626127.
- 1054 109. Ueberham U, Ueberham E, Gruschka H, Arendt T. Altered subcellular location of  
1055 phosphorylated Smads in Alzheimer's disease. *Eur J Neurosci.* 2006;24(8):2327-34. doi:  
1056 10.1111/j.1460-9568.2006.05109.x. PubMed PMID: 17074053.
- 1057 110. Benes FM, Lim B, Matzilevich D, Walsh JP, Subburaju S, Minns M. Regulation of the  
1058 GABA cell phenotype in hippocampus of schizophrenics and bipolars. *Proc Natl Acad Sci U S*  
1059 *A.* 2007;104(24):10164-9. doi: 10.1073/pnas.0703806104. PubMed PMID: 17553960; PubMed  
1060 Central PMCID: PMCPMC1888575.
- 1061 111. Stanford TR, Quessy S, Stein BE. Evaluating the operations underlying multisensory  
1062 integration in the cat superior colliculus. *J Neurosci.* 2005;25(28):6499-508. doi:  
1063 10.1523/JNEUROSCI.5095-04.2005. PubMed PMID: 16014711; PubMed Central PMCID:  
1064 PMCPMC1237124.
- 1065 112. Harris GP, Hapiak VM, Wragg RT, Miller SB, Hughes LJ, Hobson RJ, et al. Three  
1066 distinct amine receptors operating at different levels within the locomotory circuit are each  
1067 essential for the serotonergic modulation of chemosensation in *Caenorhabditis elegans*. *J*  
1068 *Neurosci.* 2009;29(5):1446-56. doi: 10.1523/JNEUROSCI.4585-08.2009. PubMed PMID:  
1069 19193891; PubMed Central PMCID: PMCPMC3418693.
- 1070 113. Luo L, Wen Q, Ren J, Hendricks M, Gershow M, Qin Y, et al. Dynamic encoding of  
1071 perception, memory, and movement in a *C. elegans* chemotaxis circuit. *Neuron.*

1072 2014;82(5):1115-28. doi: 10.1016/j.neuron.2014.05.010. PubMed PMID: 24908490; PubMed  
1073 Central PMCID: PMC4082684.  
1074 114. Ishihara T, Iino Y, Mohri A, Mori I, Gengyo-Ando K, Mitani S, et al. HEN-1, a secretory  
1075 protein with an LDL receptor motif, regulates sensory integration and learning in *Caenorhabditis*  
1076 *elegans*. *Cell*. 2002;109(5):639-49. PubMed PMID: 12062106.  
1077 115. Yoshida K, Hirotsu T, Tagawa T, Oda S, Wakabayashi T, Iino Y, et al. Odour  
1078 concentration-dependent olfactory preference change in *C. elegans*. *Nat Commun*. 2012;3:739.  
1079 doi: 10.1038/ncomms1750. PubMed PMID: 22415830.  
1080 116. Brenner S. The genetics of *Caenorhabditis elegans*. *Genetics*. 1974;77(1):71-94. Epub  
1081 1974/05/01. PubMed PMID: 4366476; PubMed Central PMCID: PMC1213120.  
1082 117. Mello CC, Kramer JM, Stinchcomb D, Ambros V. Efficient gene transfer in *C. elegans*:  
1083 extrachromosomal maintenance and integration of transforming sequences. *EMBO J*.  
1084 1991;10(12):3959-70. PubMed PMID: 1935914; PubMed Central PMCID: PMC453137.

1085

## 1086 **Supporting information**

### 1087 **S1 Table. 2-nonanone avoidance assay.**

1088 Wild type, mutants and transgenic animals are examined for avoiding 100% 2-nonanone as  
1089 previously described (Troemel et al., 1997 and S5 Figure). Avoidance Index was calculated as  
1090 described in S5 Figure. The avoidance in each genotype is represented by the average  
1091 avoidance index of individual assays.  $n = 2 - 4$  assays each genotype, 75-100 animals tested in  
1092 each assay, mutants and transgenic animals are compared with wild-type animals or the non-  
1093 transgenic siblings tested on the same days with student's *t* test, Mean  $\pm$  SEM.

1094

### 1095 **S2 Table. Time to reach the edge of the food lawn during multisensory integration**

1096 Wild type, mutants and transgenic animals are examined for the time taken to reach the edge of  
1097 the food lawn away from the repellent. The average time taken for 90% of the worms in one  
1098 assay to reach the edge of a *E. coli* OP50 food lawns during exposure to 100% 2-nonanone is  
1099 presented for each genotype (Experimental Procedures).  $n = 2 - 4$  assays for each genotype,  
1100 20-25 animals tested in each assay, mutants or transgenic animals are compared with wild-type  
1101 animals or non-transgenic siblings tested on the same days with student's *t* test, Mean  $\pm$  SEM.

1102

1103 **S3 Table. Spontaneous food leaving from an OP50 lawn without pairing with 2-nonanone.**

1104 Wild type, mutant animals and transgenic animals are examined for food leaving for 1 hour.

1105 Young adult worms are placed on an OP50 food lawn for 1 hour and the number of worms on

1106 food lawn is counted every 5 minutes for a total assay time of 60 minutes. The percentage of

1107 worms off the food lawn at 15 minutes is reported.  $n = 2 - 4$  assays for each genotype and 20-

1108 25 worms in each assay, mutants or transgenic animals are compared with wild-type animals

1109 tested in parallel with student's  $t$  test, Mean  $\pm$  SEM.

1110

1111 **S4 Table. Many signaling mutants show no phenotype in 2-nonanone-dependent food**

1112 **leaving.** Wild type, mutant and transgenic animals are examined for leaving an *E. coli* OP50

1113 food lawn paired with 100% 2-nonanone. The average percentage of worms outside the food

1114 lawn at 15 minutes is reported. Mutants or transgenic animals are compared with the wild-type

1115 control tested on the same days with student's  $t$  test,  $n = 2 - 4$  assays for each genotype, 20-25

1116 animals in each assay, Mean  $\pm$  SEM.

1117

1118 **S5 Fig. Schematics of assays**

1119 **(A)** Assay to measure time taken to reach the edge of the food lawn (Experimental Procedures).

1120 **(B)** Chemotaxis assay for avoidance of 100% 2-nonanone (Experimental Procedures)

1121

1122 **S6 Fig. Additional alleles of *tdc-1* and *tbh-1* mutants are also wild-type for 2-nonanone-**

1123 **dependent food leaving.**

1124 Each bar graph shows the percentage of animals outside the food lawn 15 minutes after the

1125 start of the assay, mutants are compared with wild type tested in parallel with Student's  $t$  test,

1126  $n = 3$  assays each; mean  $\pm$  SEM, n.s., not significant.

1127

1128 **S7 Fig. DAF-7 produced by the sensory neurons ASI does not regulate 2-nonanone-**  
1129 **dependent food leaving.**

1130 Expressing a wild-type *daf-7* cDNA in the sensory neurons ASI does not rescue the delayed  
1131 decision phenotype in the *daf-7(e1372)* mutant animals (n = 4, 3 and 4 assays for wild type,  
1132 transgenic animals and non-transgenic siblings, respectively).

1133 Each bar graph shows the average percentage of worms outside the lawn 15 minutes after the  
1134 start of the assay, transgenic animals are compared with non-transgenic siblings using  
1135 Student's *t*-test, n.s., not significant.

1136

1137 **S8 Fig. Expressing the *daf-1* cDNA in sensory neurons with *osm-6* promoter does not**  
1138 **rescue the delayed-decision phenotype in the *daf-1(m40)* mutants.** The transgenic animals  
1139 (n = 3 assays) are compared with non-transgenic siblings (n = 4 assays) with Student's *t* test,  
1140 wild type = 3 assays; bar graph shows the percentage of worms outside of lawn 15 minutes  
1141 after the start of the assay, mean  $\pm$  SEM, n.s., not significant.

1142

1143 **S9 Movie. Wild-type worms performing food leaving on an *E. coli* OP50 lawn paired with**  
1144 **100% 2-nonanone.**

1145

1146 **S10 Movie. Wild-type worms performing food leaving on an *E. coli* OP50 food lawn paired**  
1147 **with 100% benzaldehyde.**

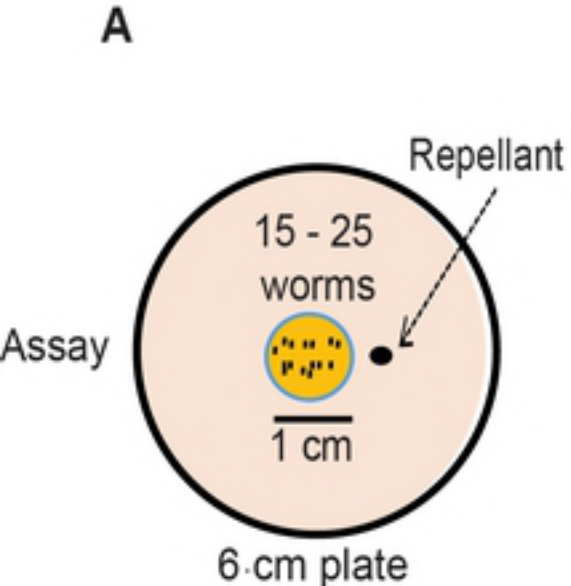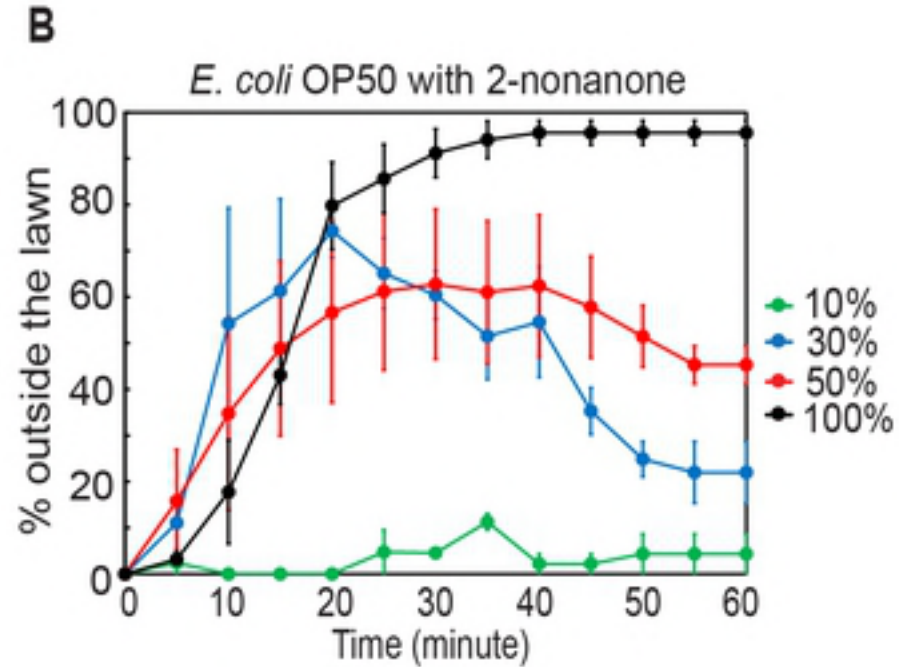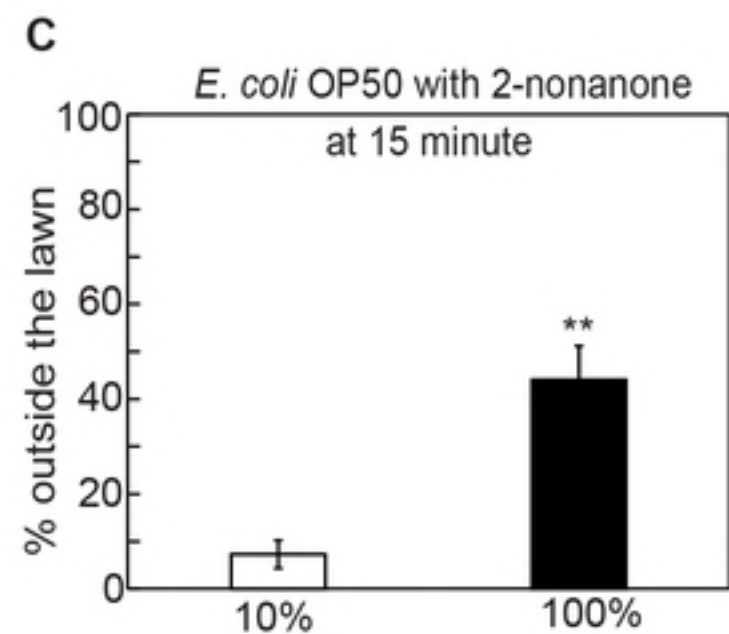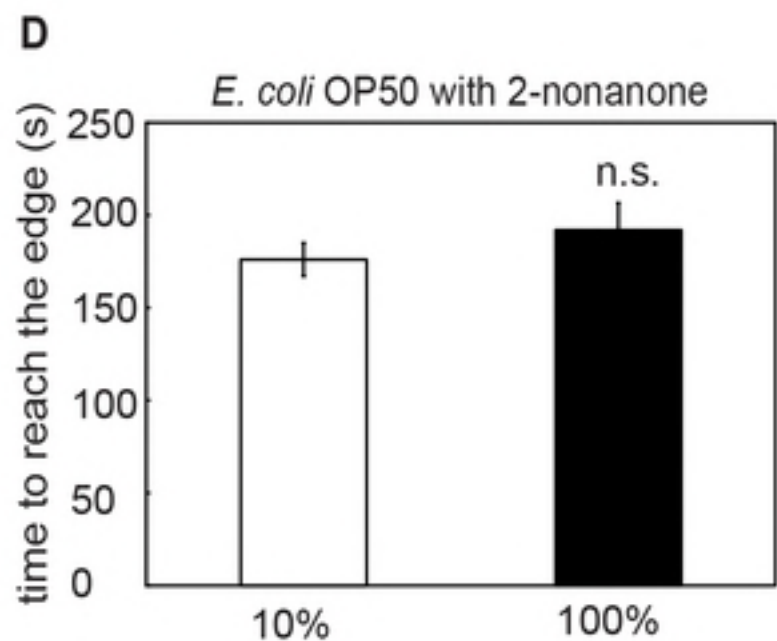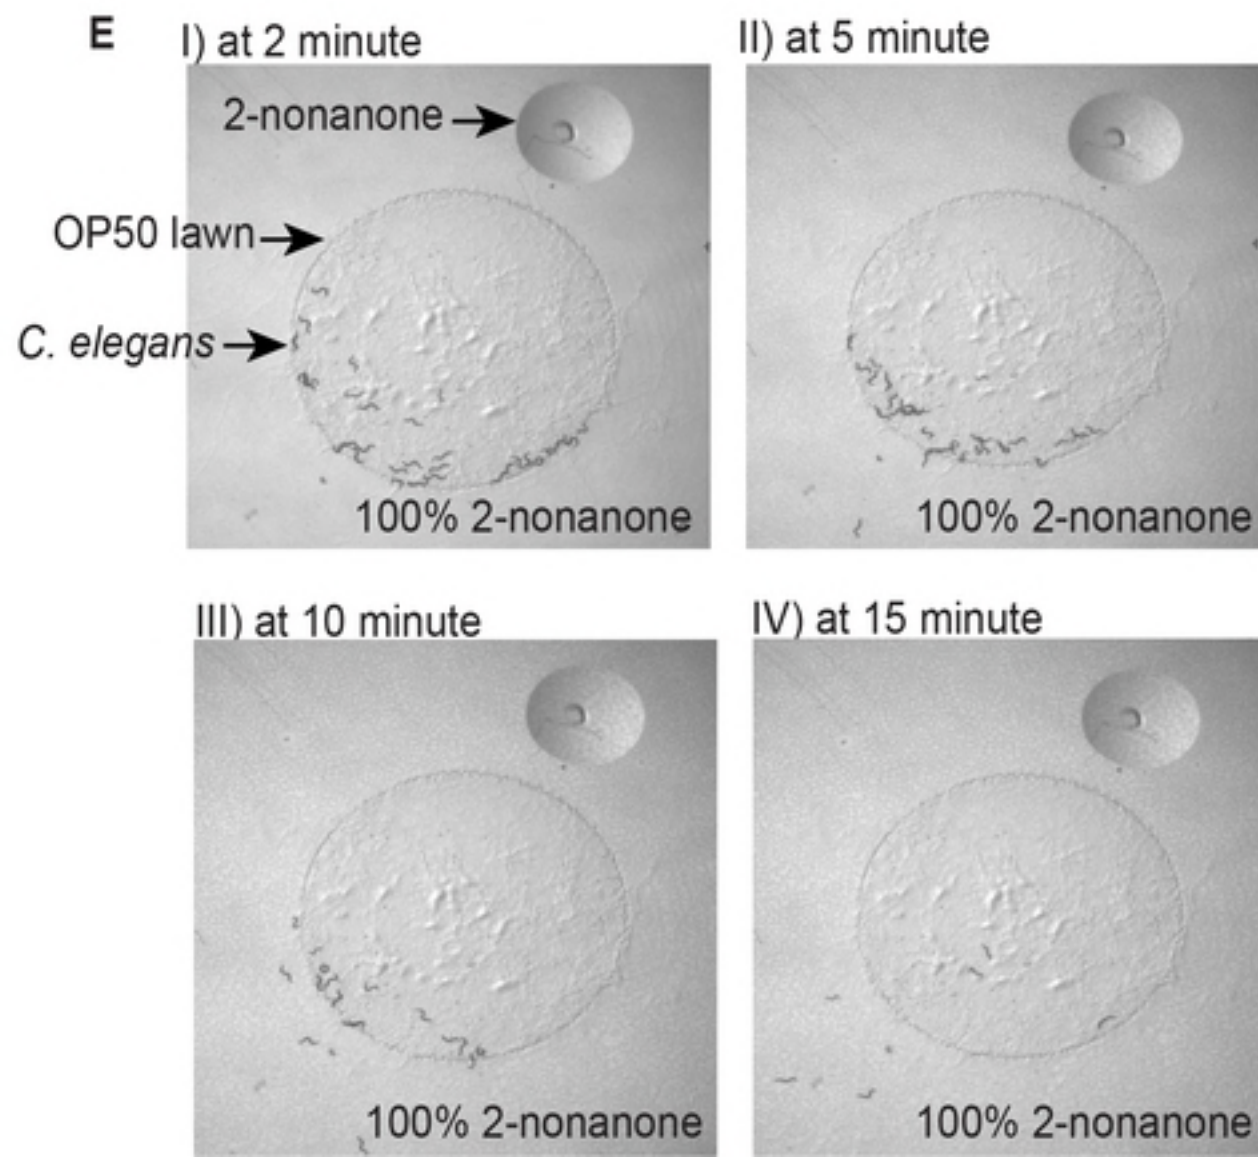



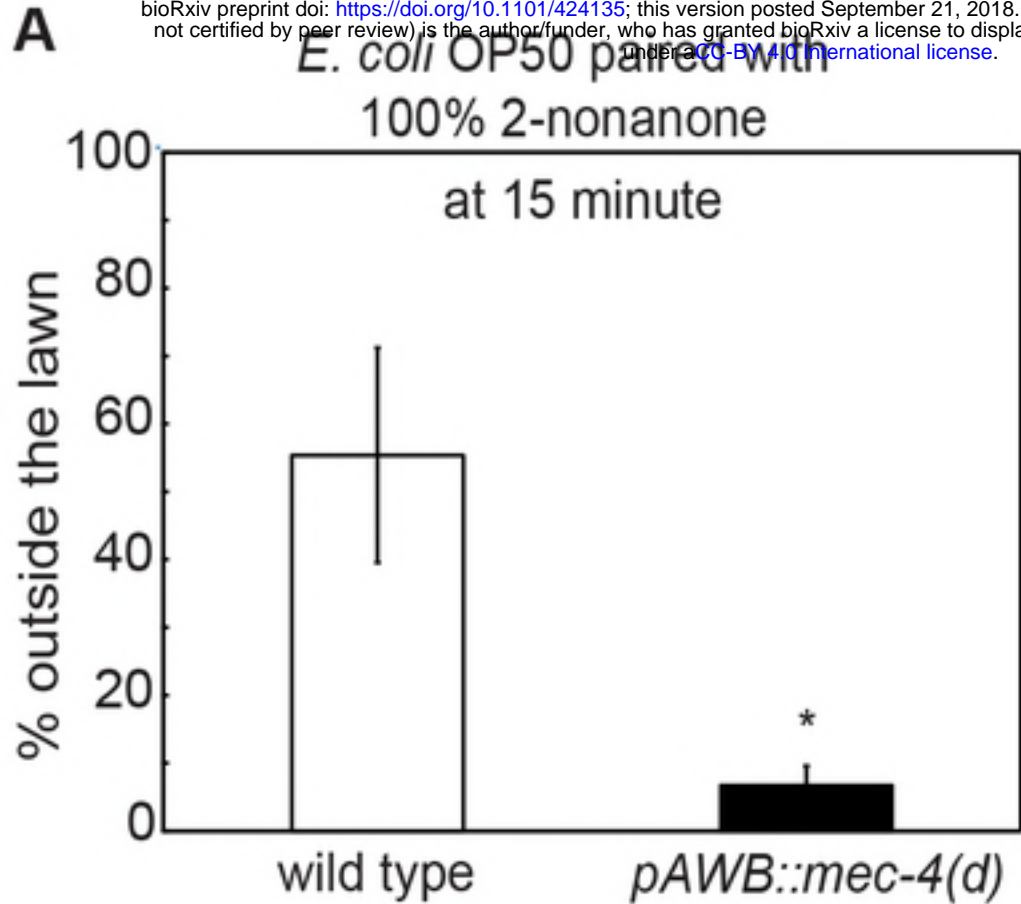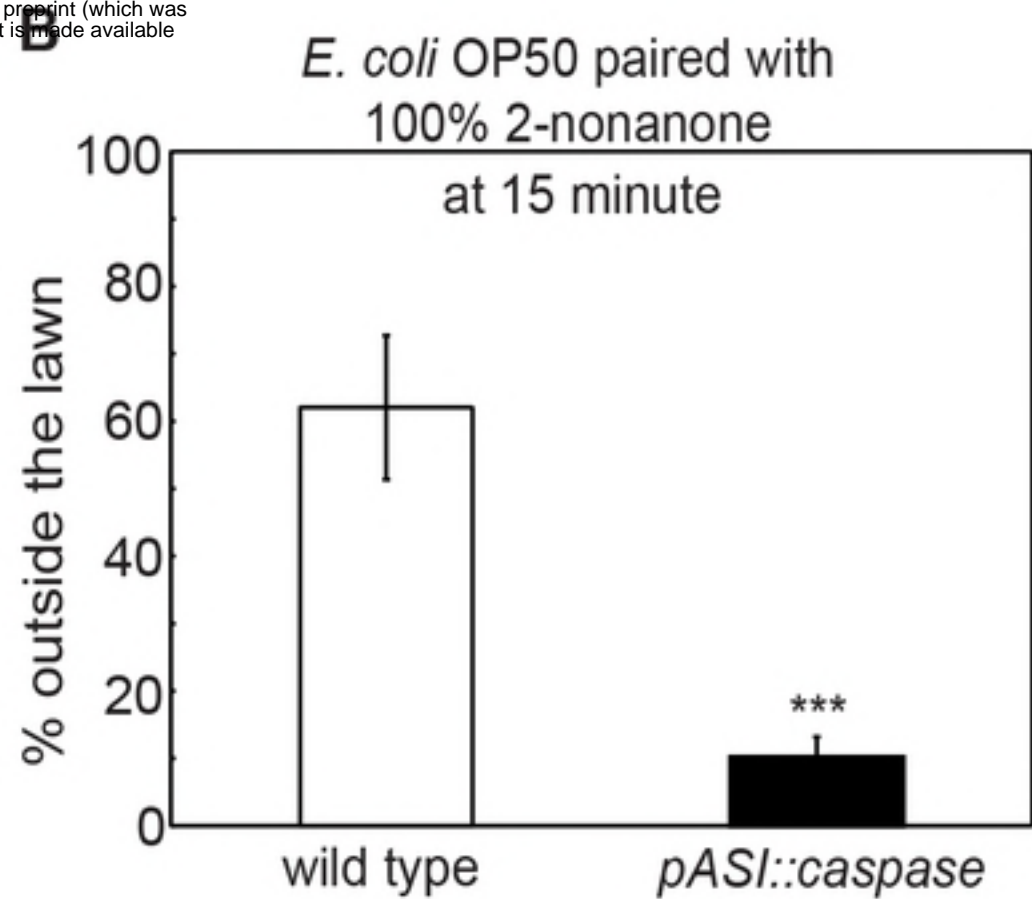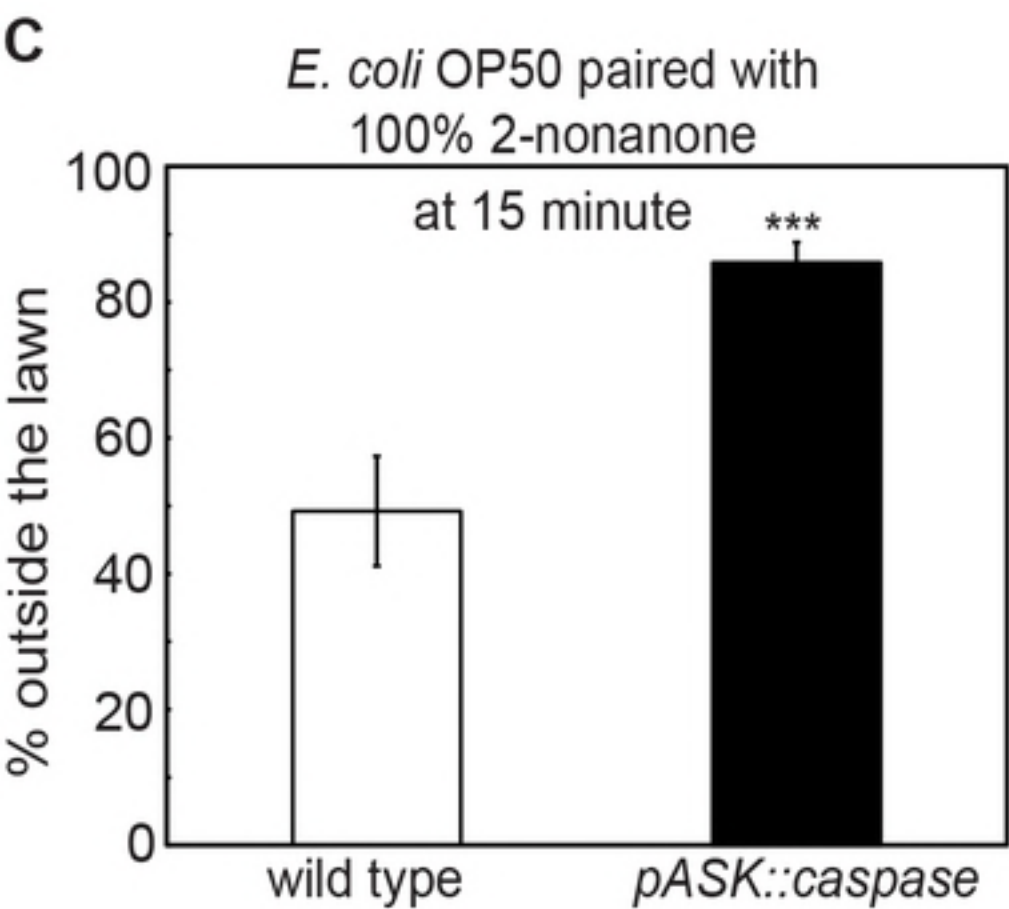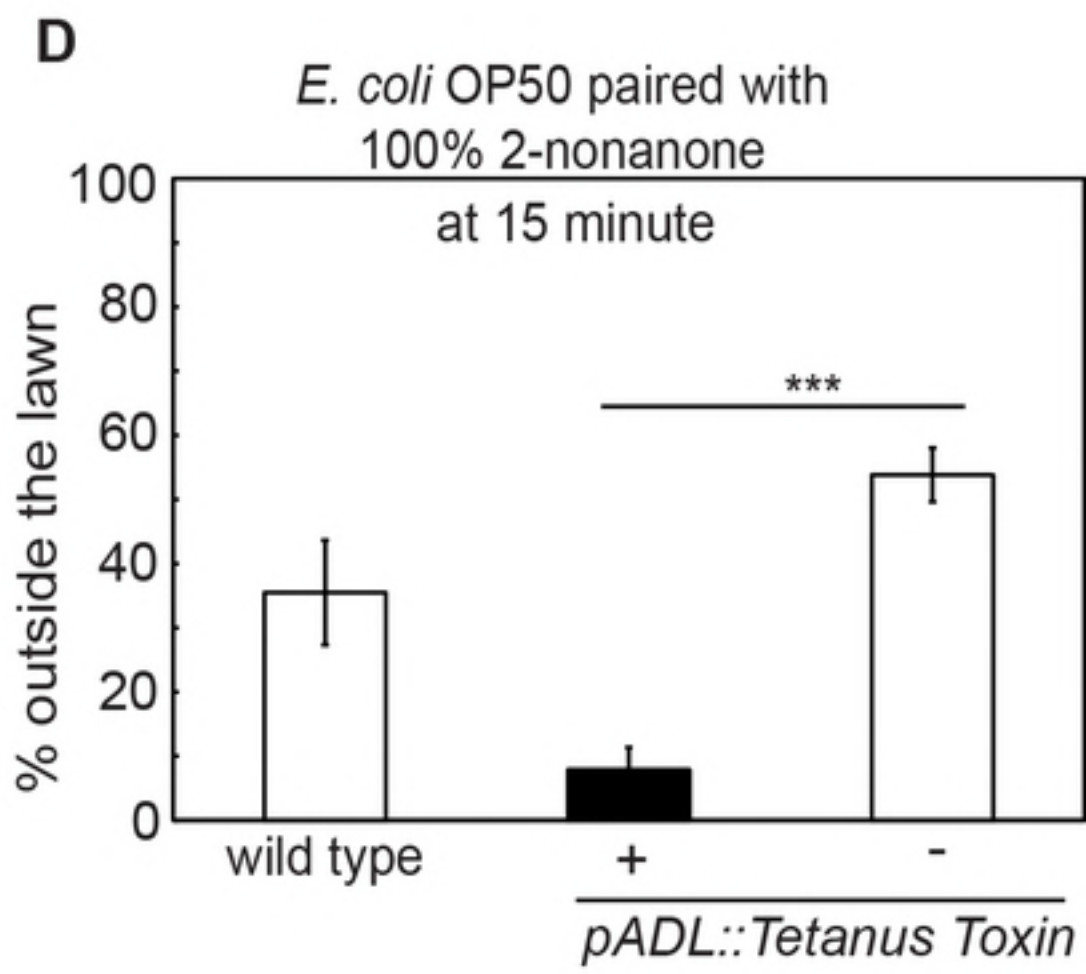

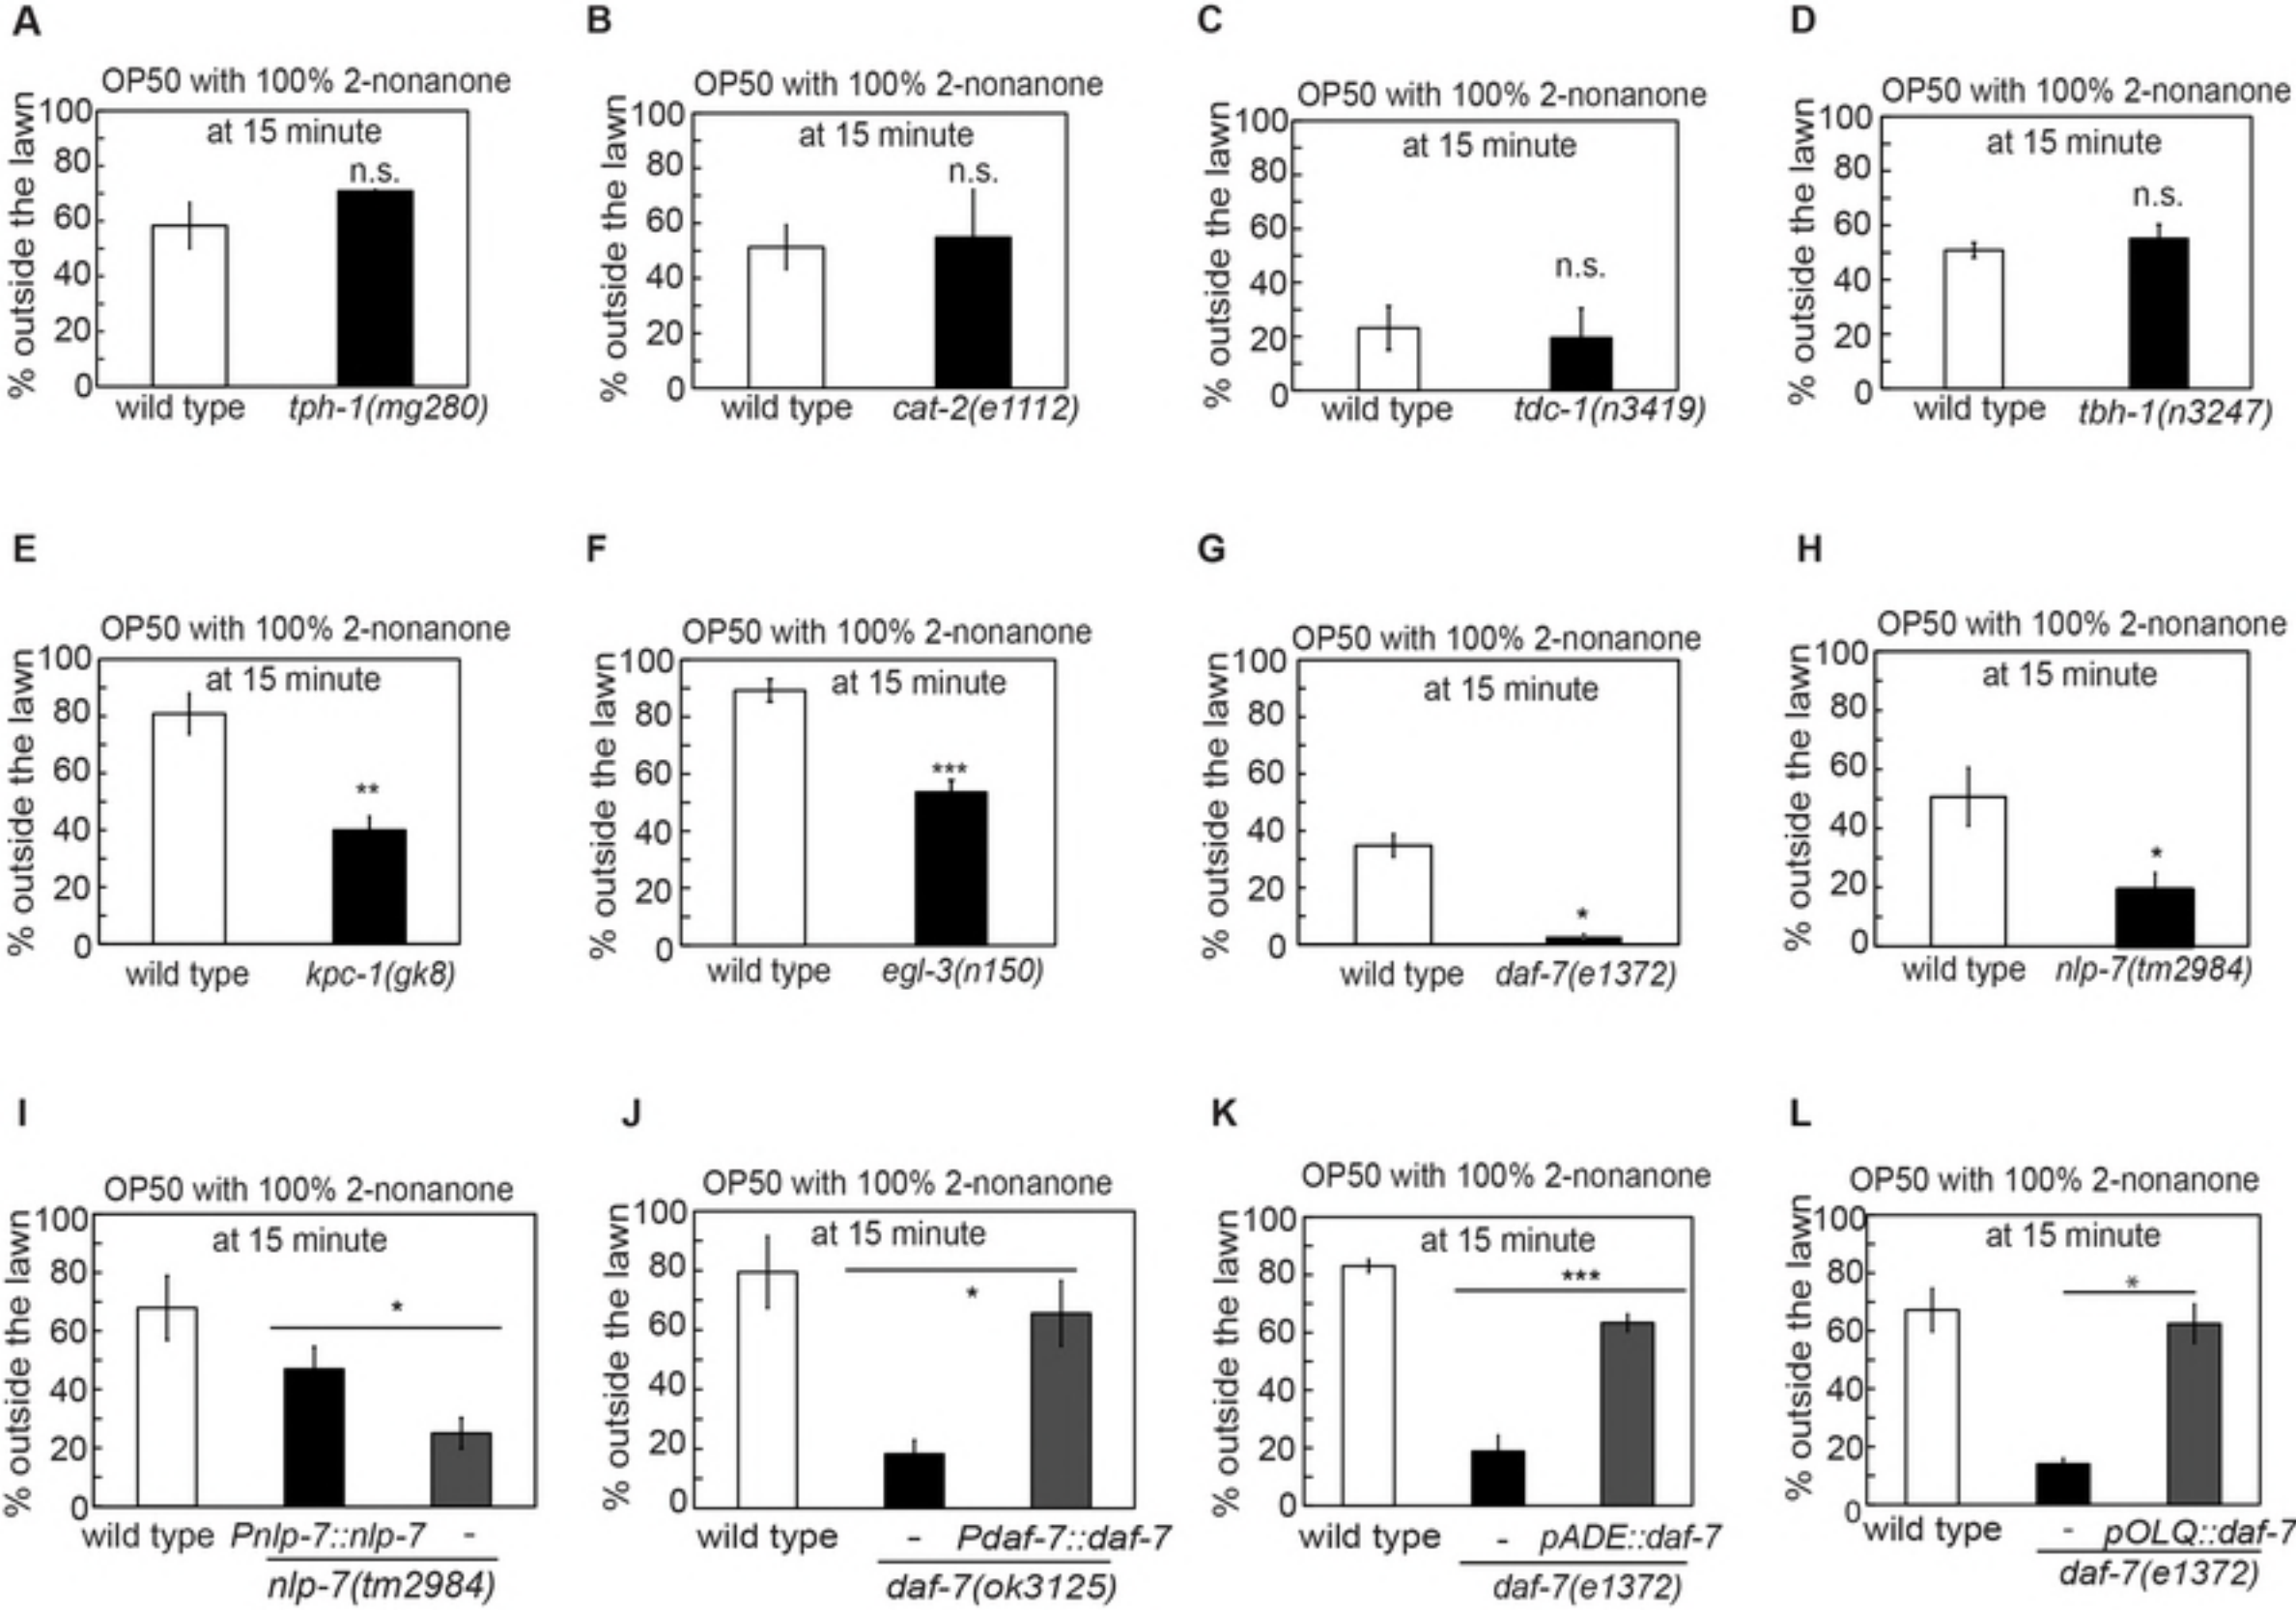

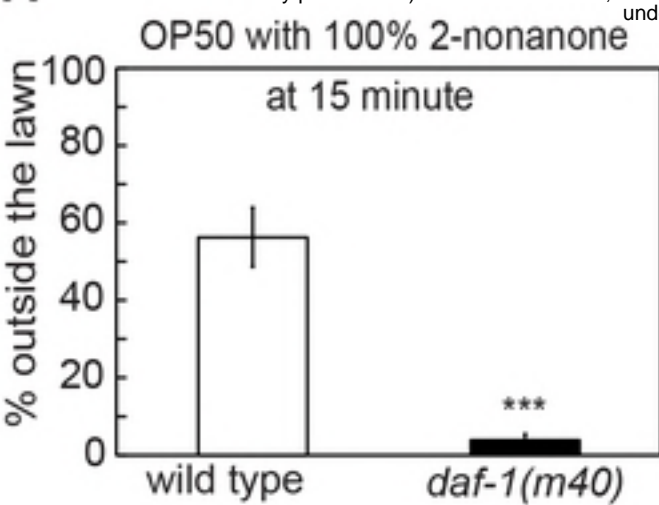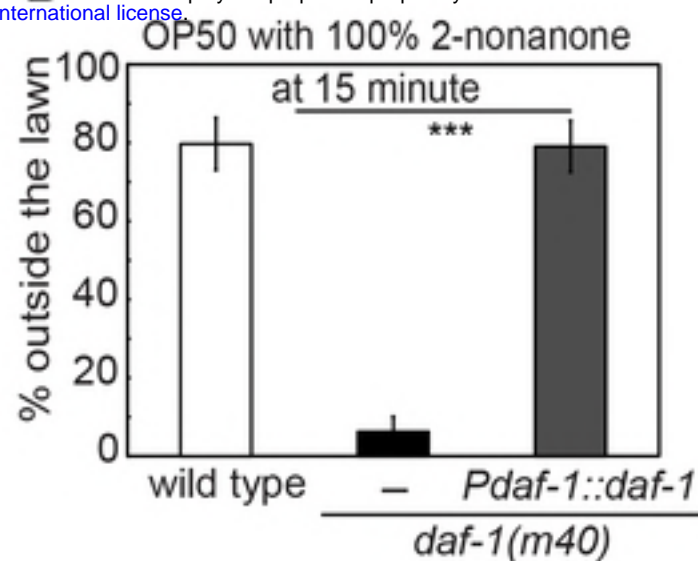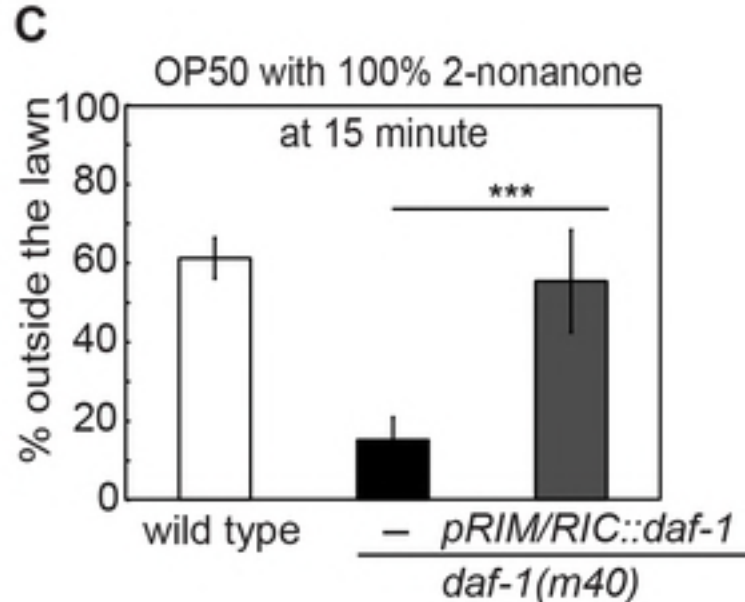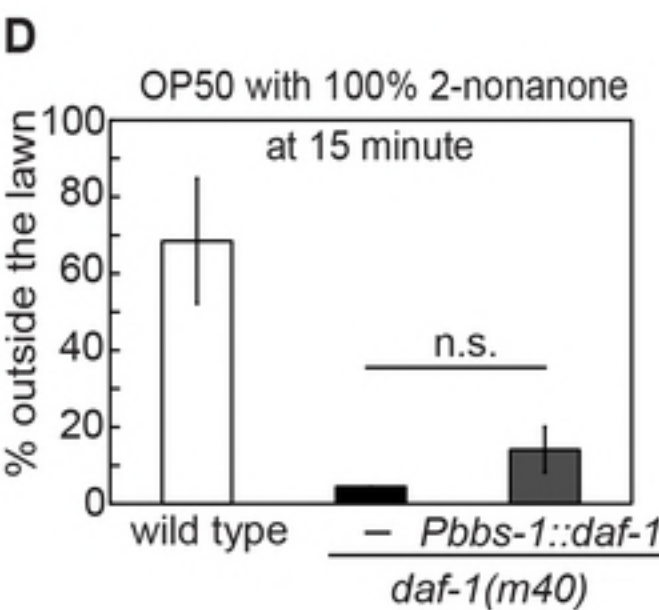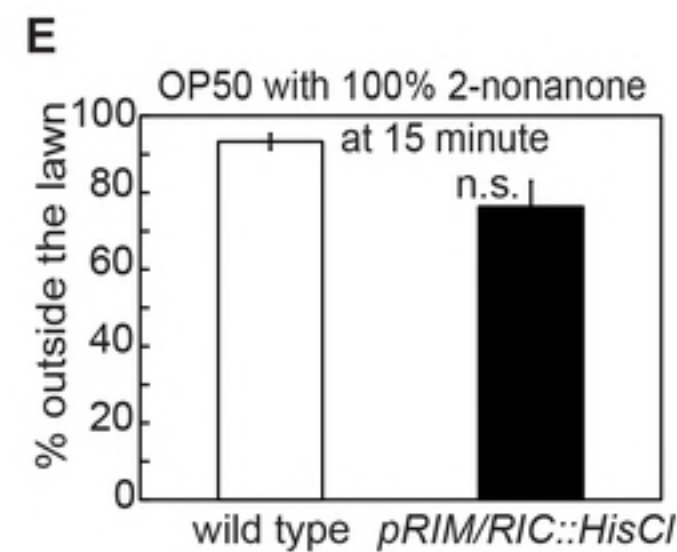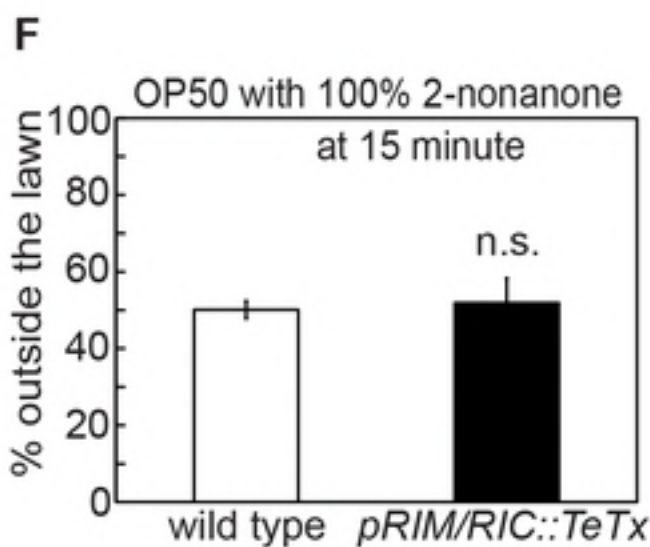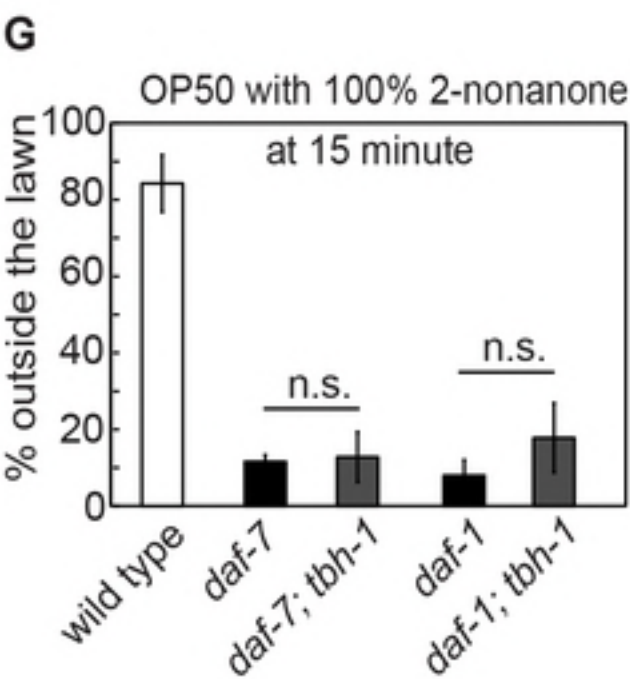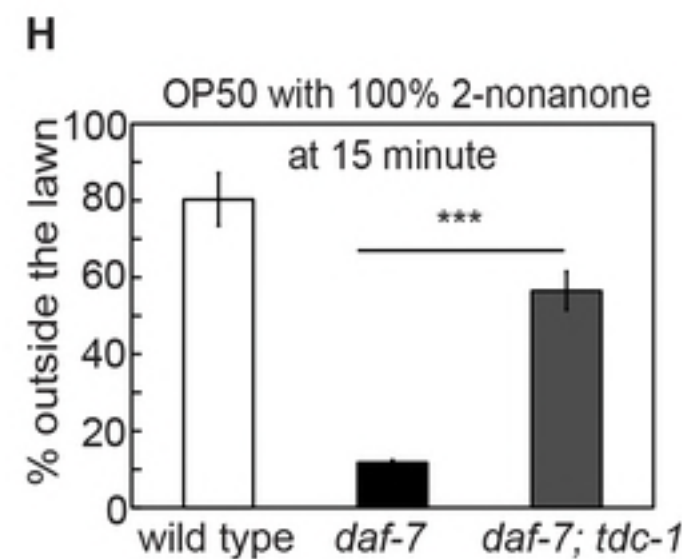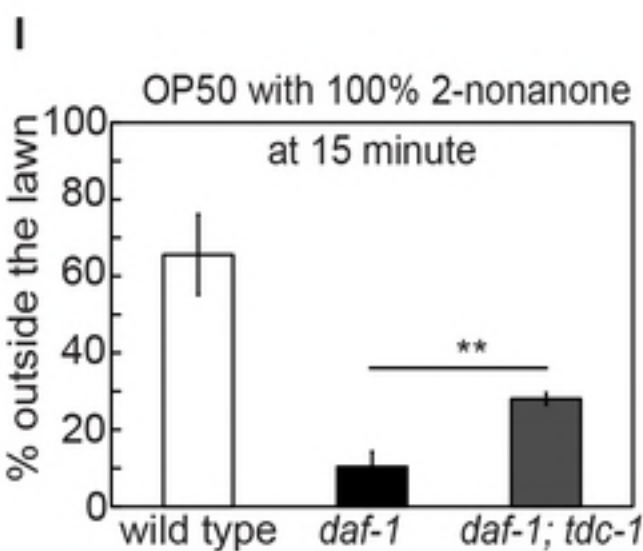

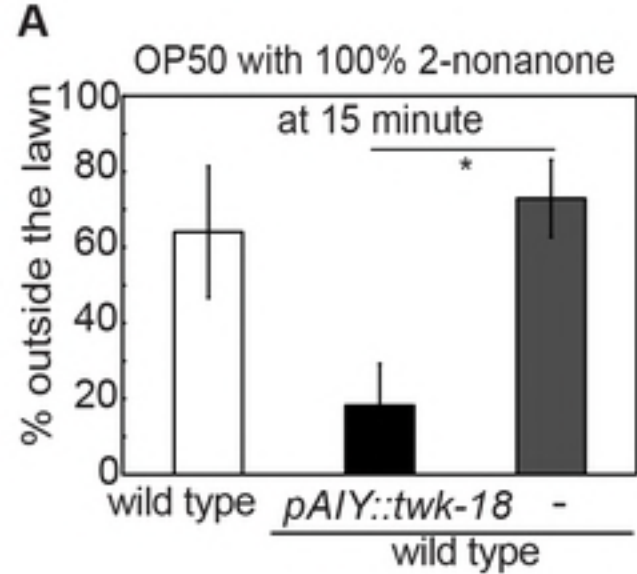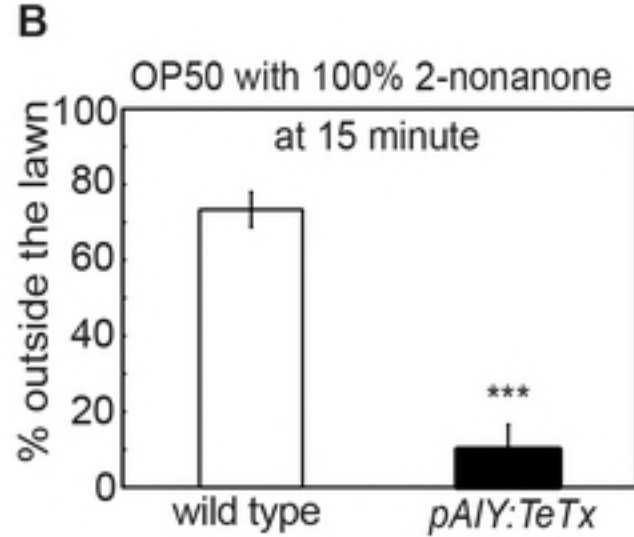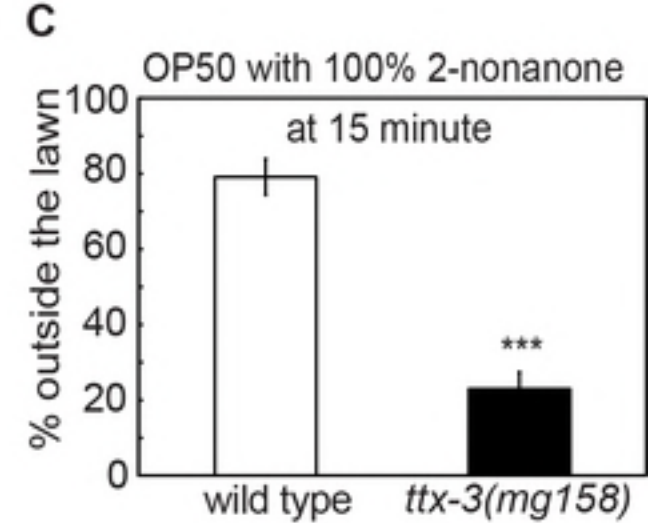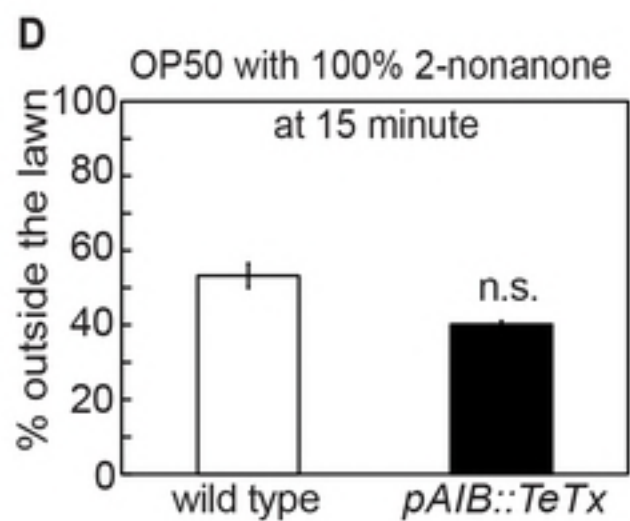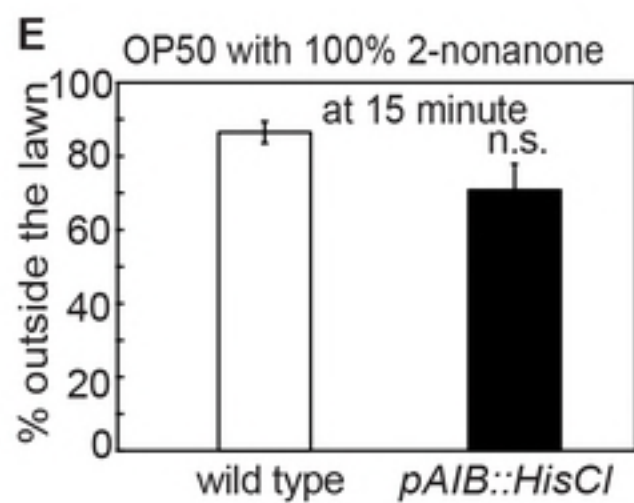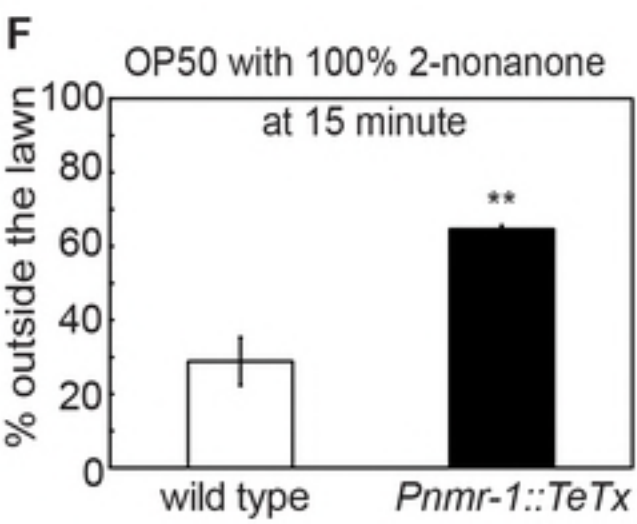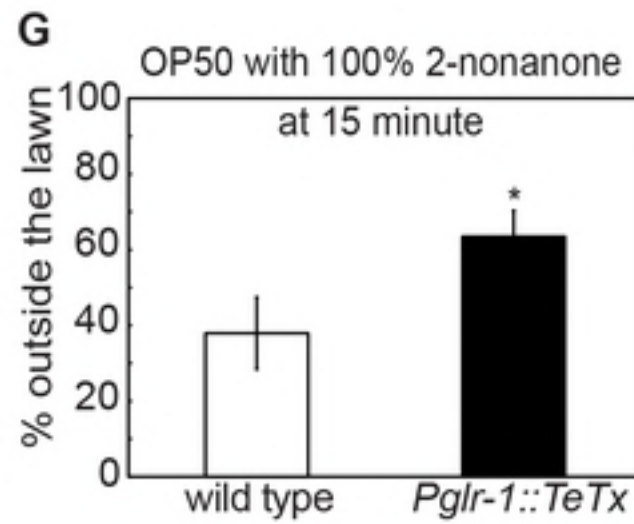

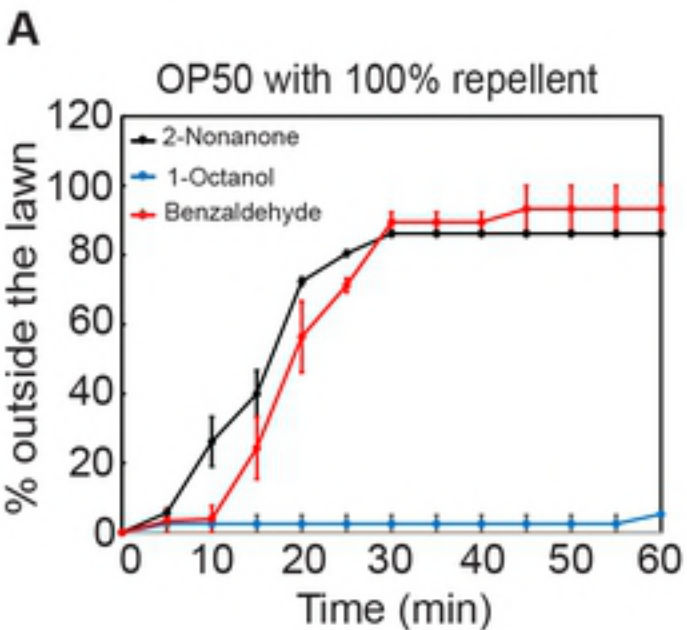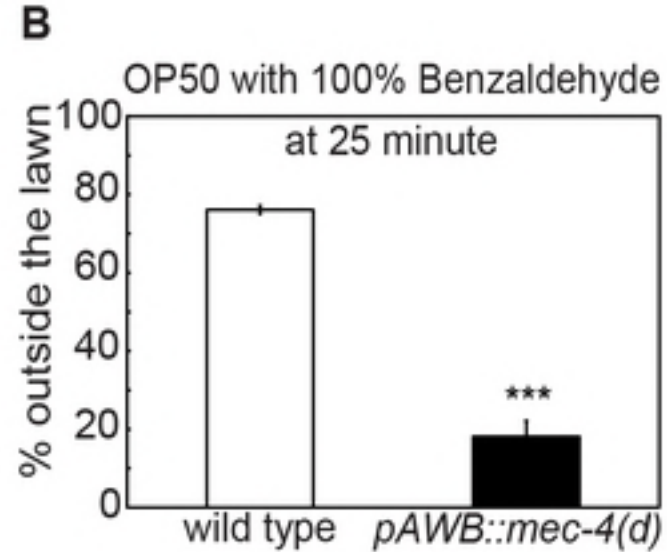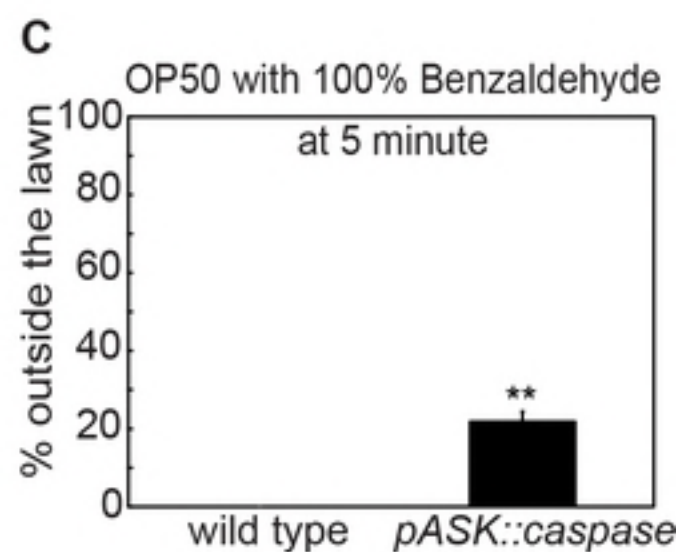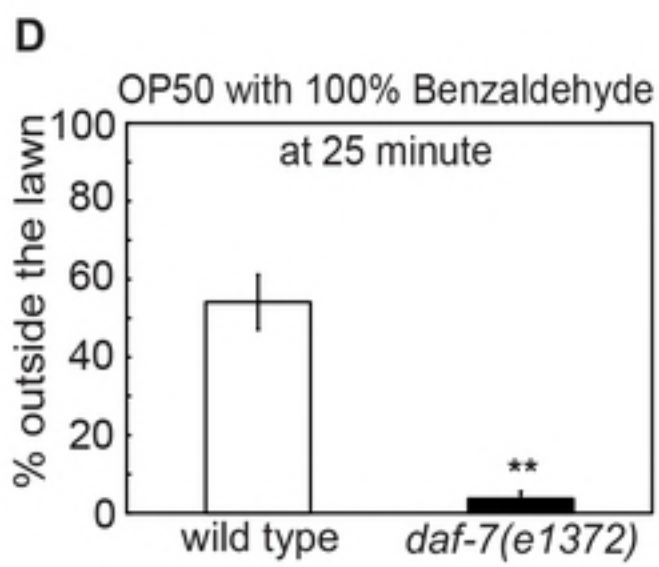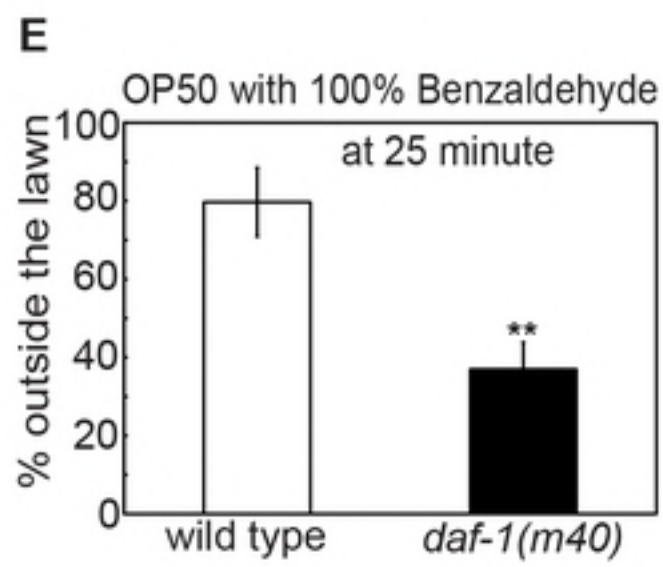

**A**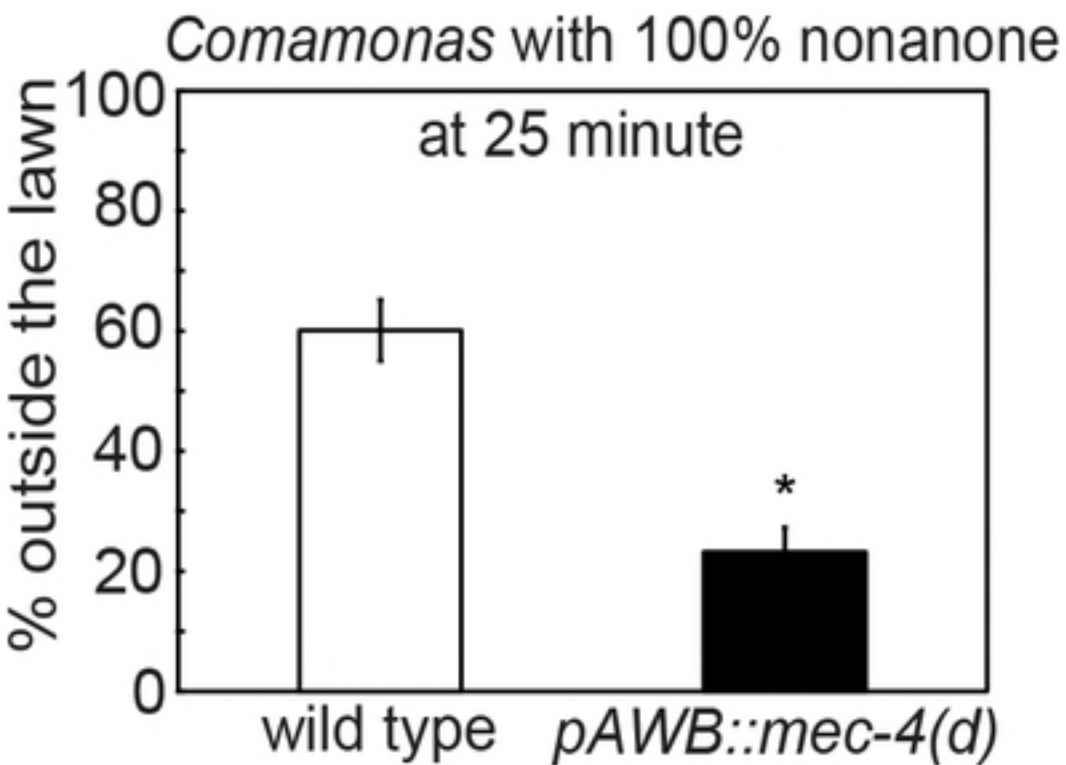**B**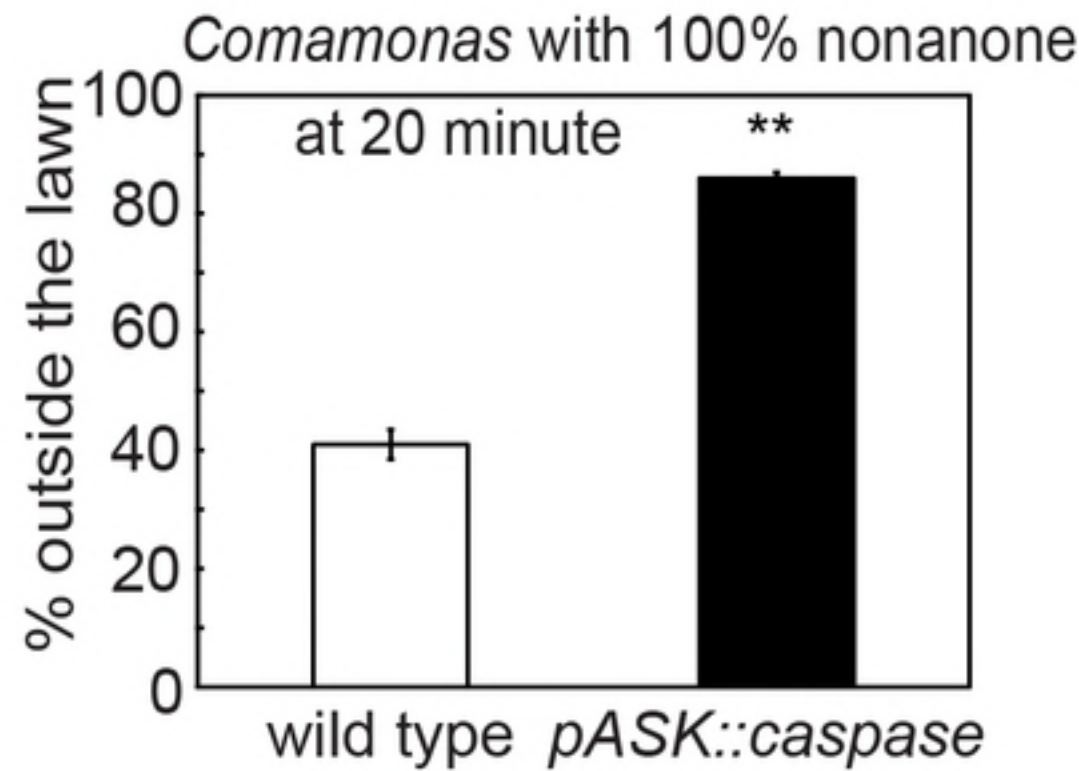**C**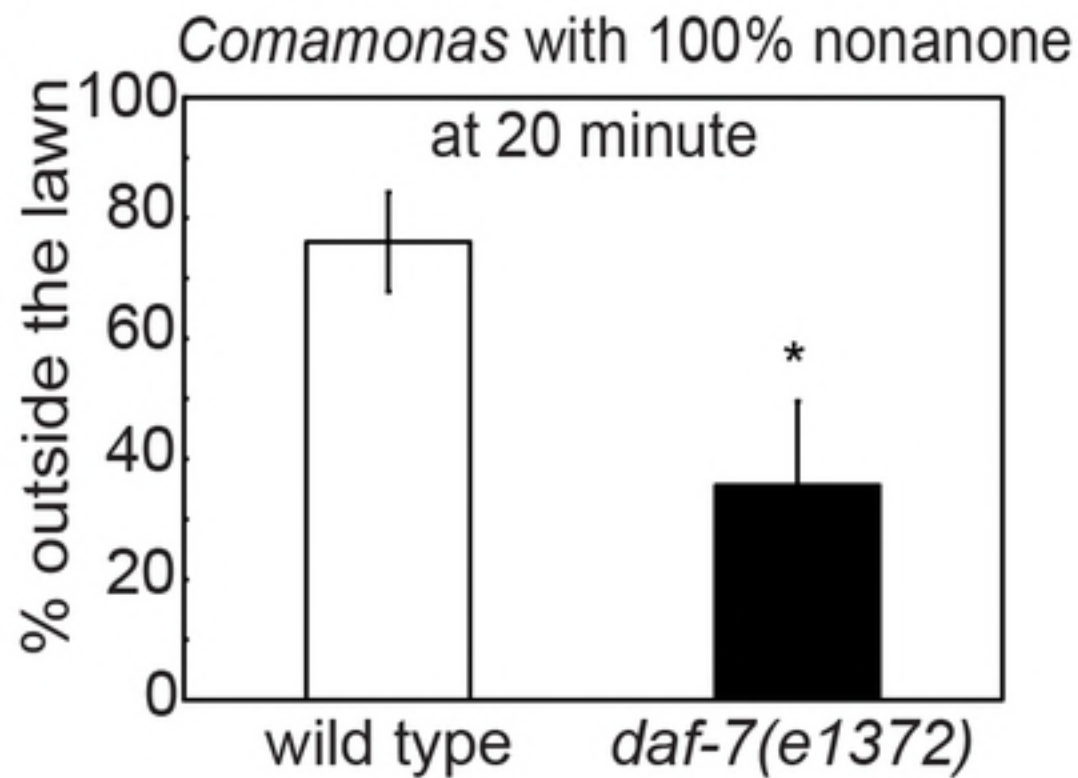**D**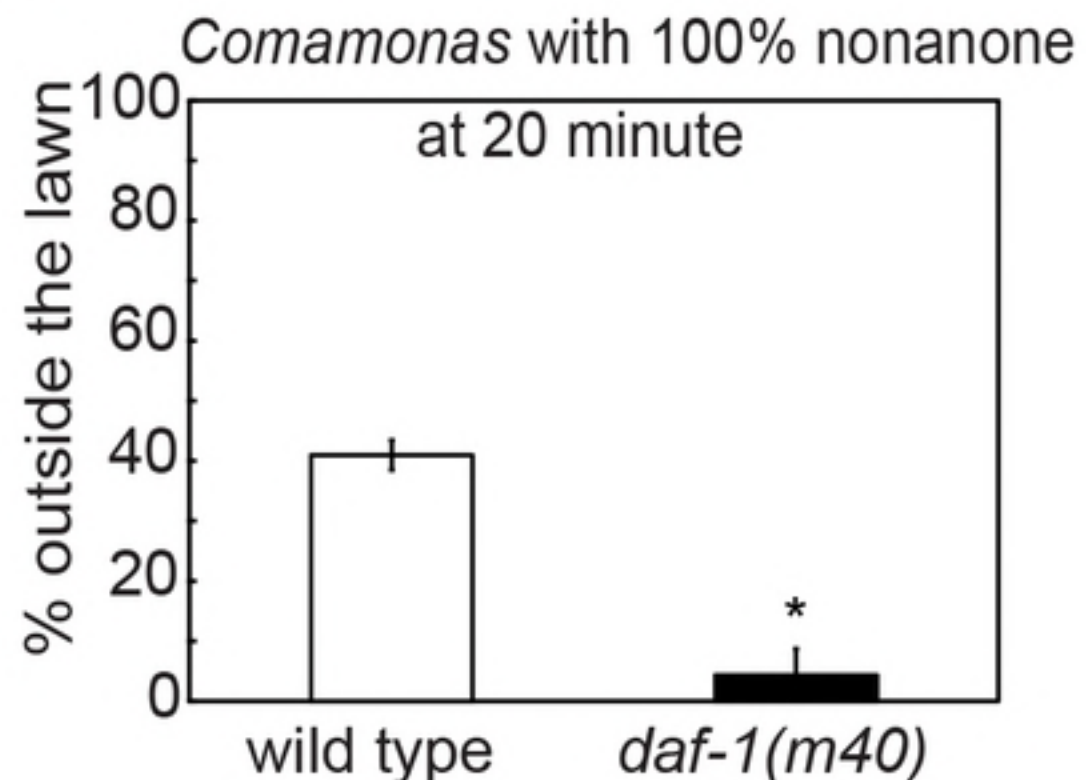

Source: https://www.biorxiv.org/content/10.1101/424135v1.full.pdf
